# Supplementary material for: Draft genome sequencing and secretome analysis of fungal phytopathogen Ascochyta rabiei provides insight into the necrotrophic effector repertoire
Source: PubMed Central journal article supplement (PMC4835772; doi:10.1038/srep24638), 2016-04-19
Supplement: srep24638-s1.pdf [file srep24638-s1.pdf]

**Draft genome sequencing and secretome analysis of fungal phytopathogen *Ascochyta rabiei* provides insight into the necrotrophic effector repertoire**

Sandhya Verma, Rajesh Kumar Gazara, Shadab Nizam, Sabiha Parween, Debasis Chattopadhyay & Praveen Kumar Verma\*

National Institute of Plant Genome Research, Aruna Asaf Ali Marg, New Delhi-110067,  
India

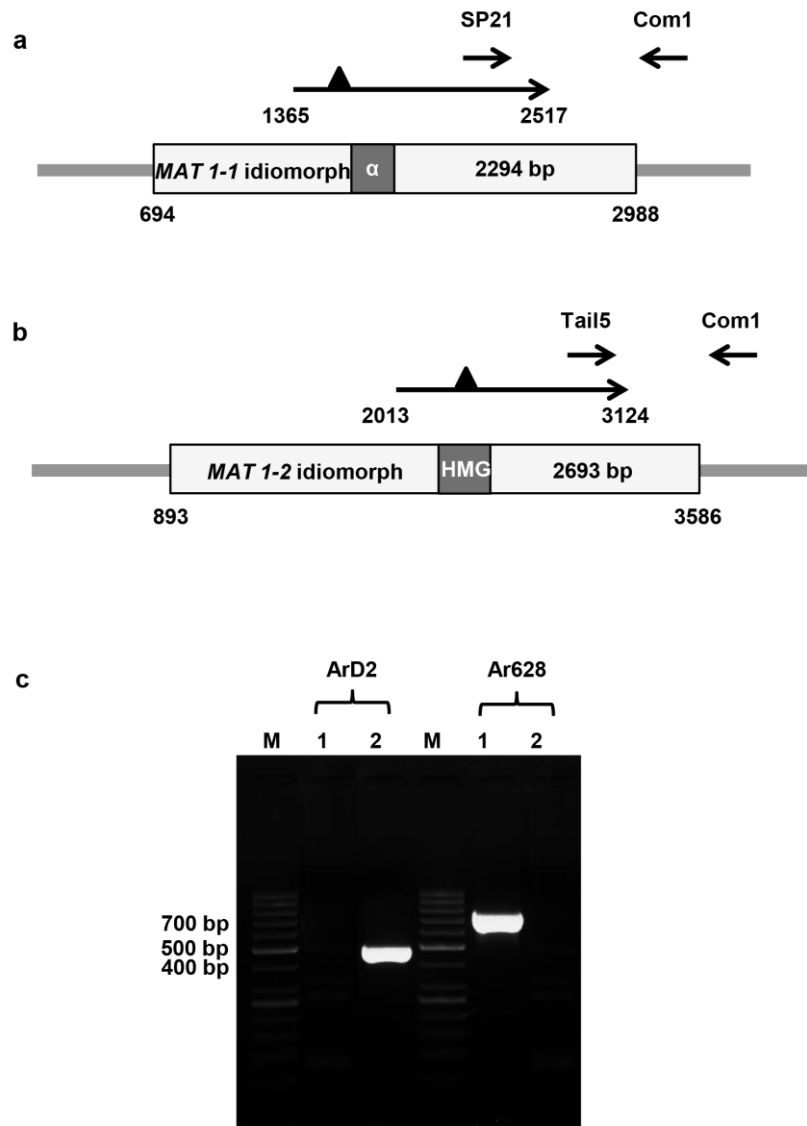

**Supplementary Figure 1. Determination of the mating type of *A. rabiei* D2.** The mating type was determined by PCR using *MAT* idiomorph-specific primers. **(a)** and **(b)** A schematic representation of the structural organization of *A. rabiei* *MAT1-1* and *MAT1-2*. **(c)** An ethidium bromide-stained 1% agarose gel showing bands obtained by PCR to detect the *MAT* locus. The lanes numbered 1 and 2 represent PCR with primer pairs Com1 (common flanking primer)/SP21 (*MAT1-1*-specific) and Com1/Tail 5 (*MAT1-2*-specific), respectively. The Ar628 strain of *A. rabiei* was used as a control for mating type 1.

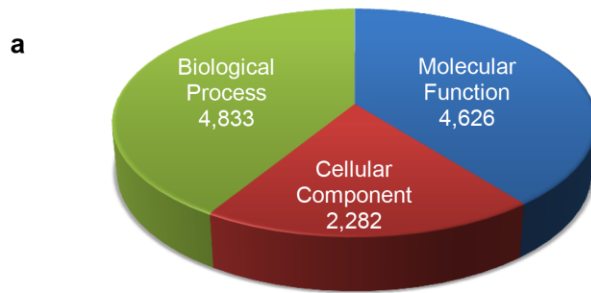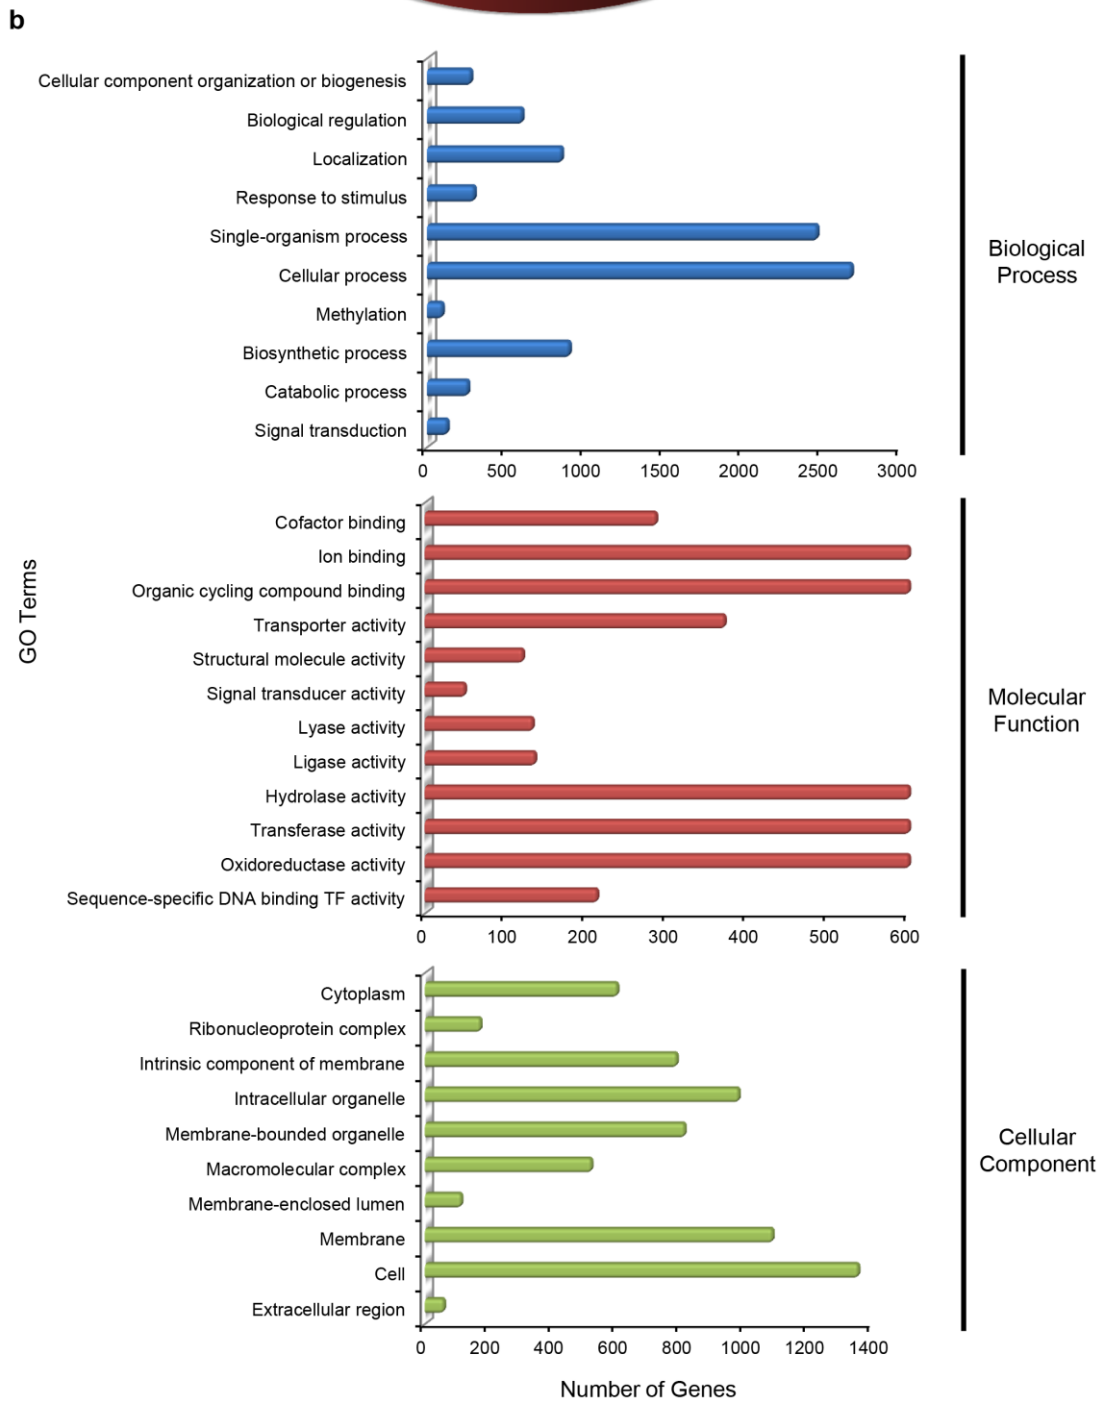

**Supplementary Figure 2. Gene Ontology (GO) functional annotations of predicted *A. rabiei* genes.** GO classification was performed based on similarity searches against the NCBI non-redundant database using BLAST2GO software. **(a)** The genes were enriched into three primary GO categories. In total, 4,833 genes were assigned GO terms in the biological process category; however, 4,626 and 2,282 genes were assigned GO terms in the molecular function and cellular component categories, respectively. **(b)** Different terms under each GO category (biological process, molecular function and cellular component) are displayed. The major 10 categories in biological process, 12 categories in molecular function, and 10 categories in cellular component are shown. The *x*-axis represents the number of genes in a functional group, and the *y*-axis represents the GO terms.

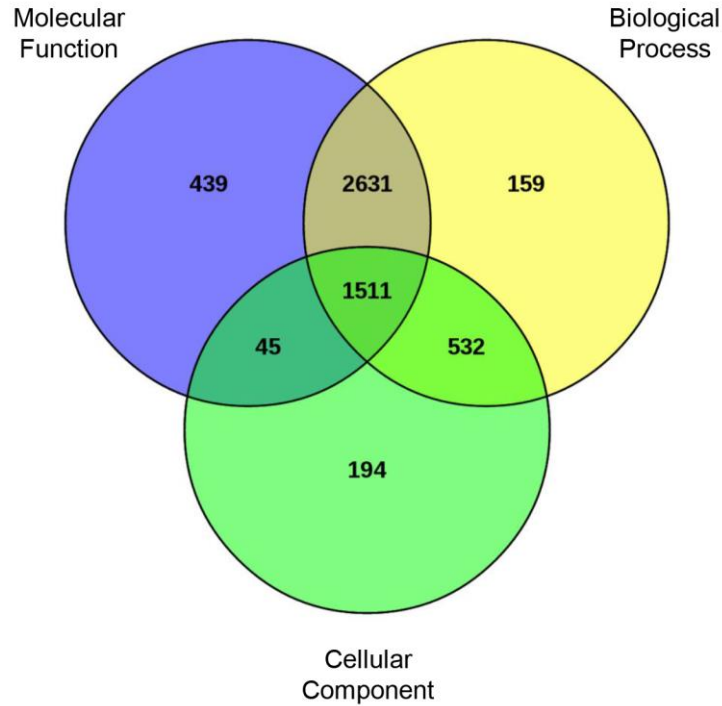

**Supplementary Figure 3. The *A. rabiei* predicted genes assigned with Gene Ontology (GO) functional annotations.** BLAST2GO software was used for GO classification based on similarity searches against the NCBI non-redundant database. In total, 5,511 genes (52% of total genes) were assigned GO terms in three primary categories. The Venn diagram shows *A. rabiei* genes having unique and shared GO terms. Almost 1,511 genes were assigned GO terms in all three categories, i.e., molecular function, biological process and cellular component. However, 439, 159 and 194 genes had GO terms unique to molecular function, biological process and cellular component, respectively.

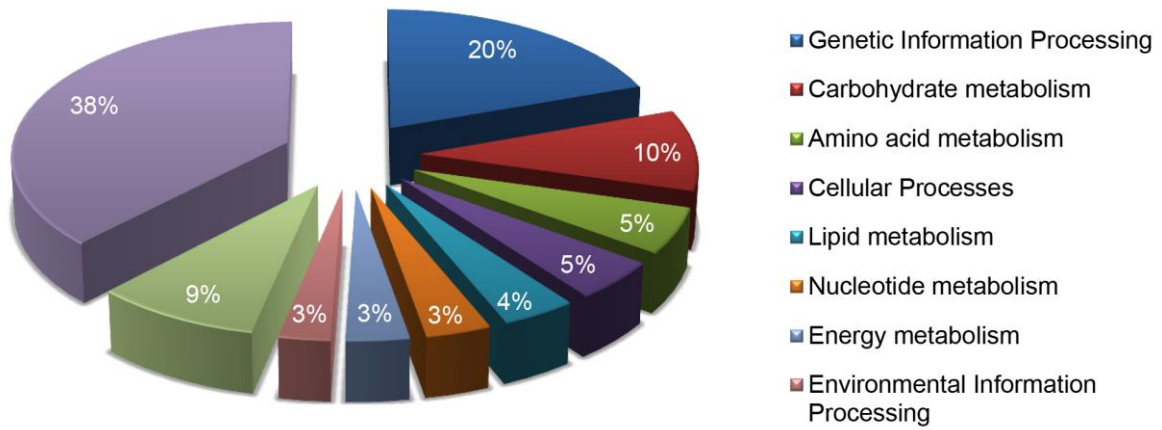

**Supplementary Figure 4. Functional annotations of predicted *A. rabiei* proteins based on KEGG Orthology.** Annotation was performed using the KEGG database and blastKOALA. The proteins were functionally categorized into 10 distinct categories.

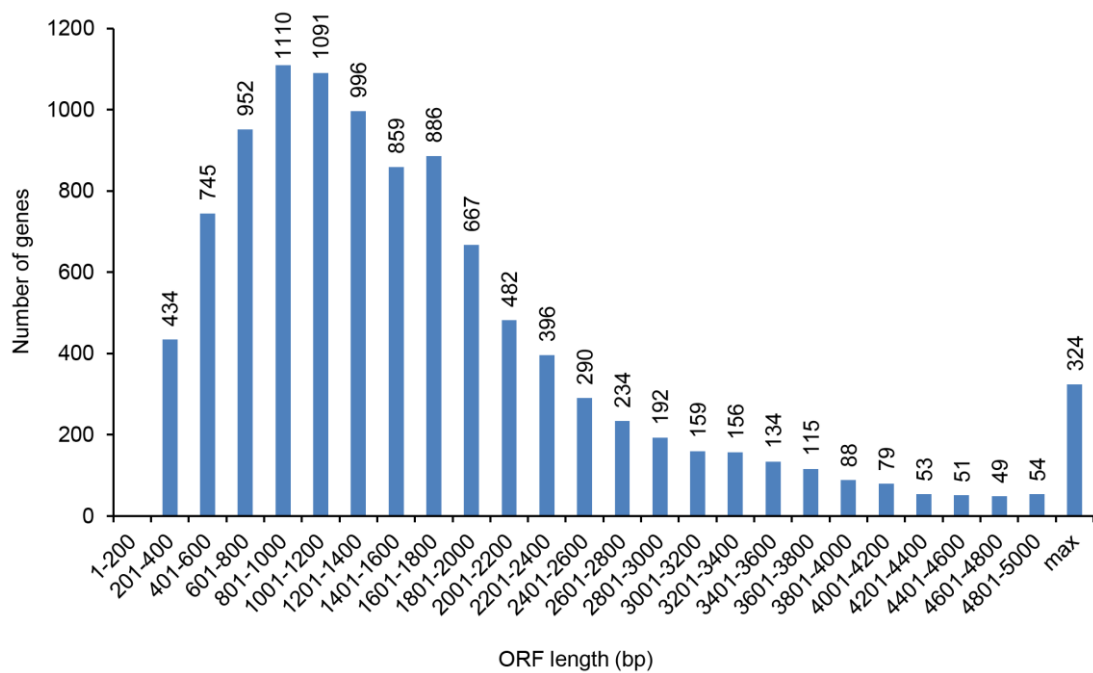

**Supplementary Figure 5. ORF length distribution of the predicted genes of *A. rabiei*.**

The ORFs of lengths between 801-1000 bp were found to be the most abundant, followed by the ORFs of lengths between 1001-1200 bp.

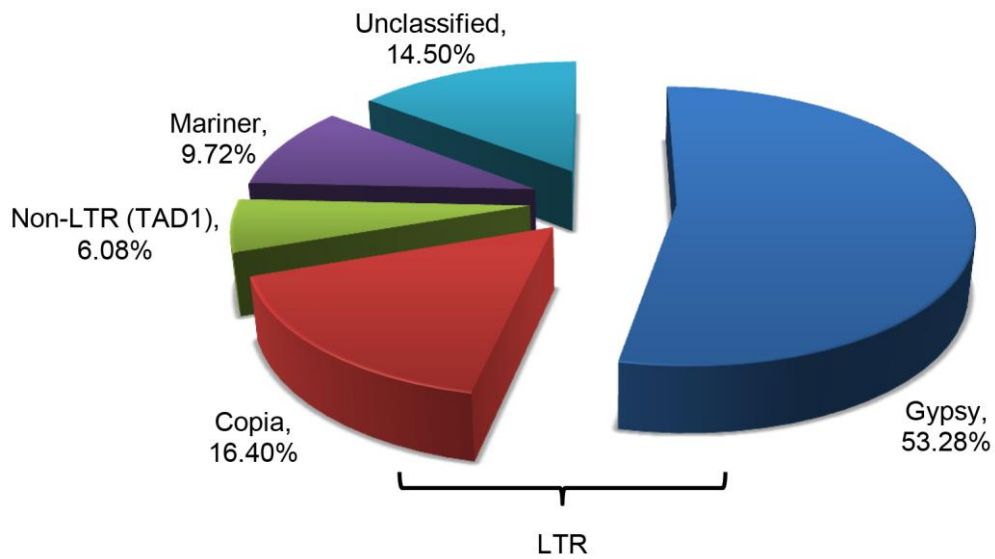

**Supplementary Figure 6. Relative abundance of transposable elements in the *A. rabiei* genome.** The proportion (%) of different types of repetitive sequences present in the *A. rabiei* genome. In the LTR type retrotransposons, *Gypsy* is the most abundant type of TE, followed by *Copia*. However, the non-LTR Tad1 is the least abundant form of TE. Repetitive elements were identified *de novo* using RepeatScout and then annotated manually by a TBLASTX search against RepBase.



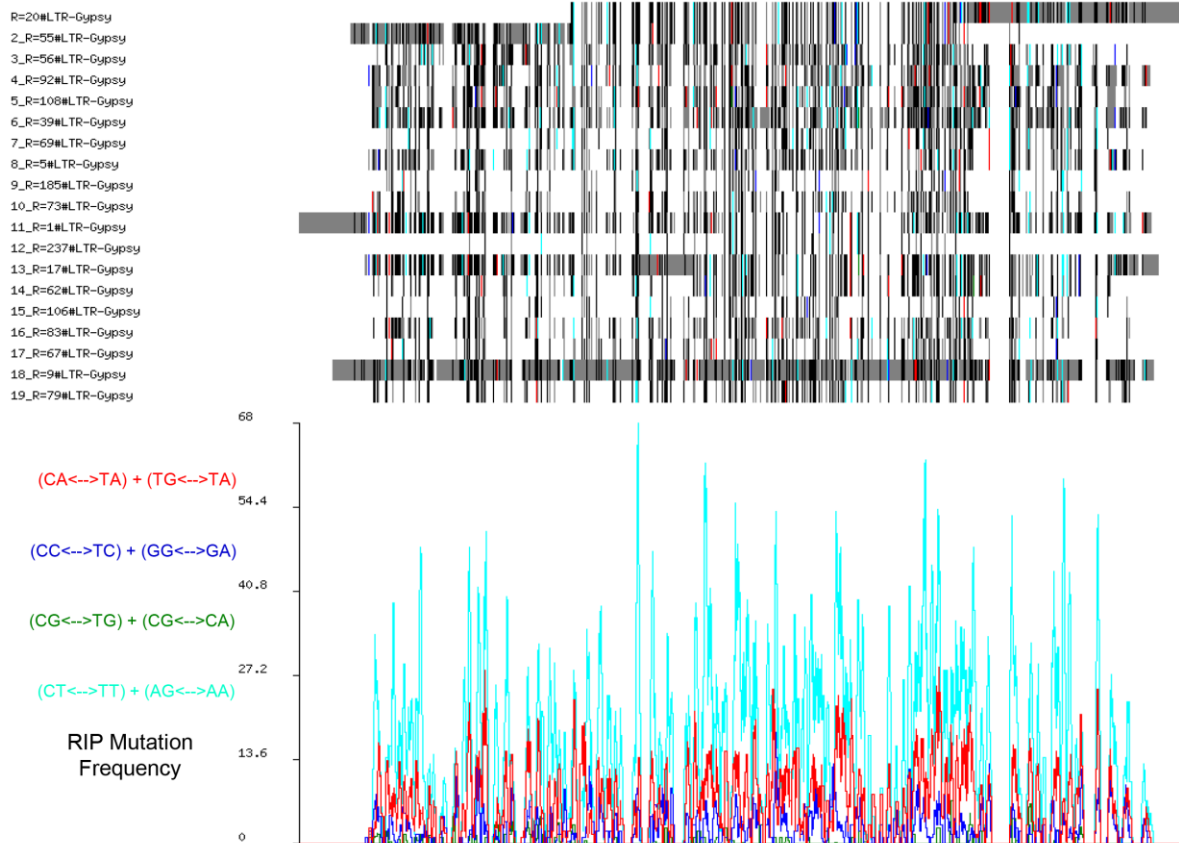

**Supplementary Figure 7. RIP mutation in *Gypsy* class of LTR retrotransposons shown as RIPCAL output.** The upper panel of output shows multiple alignment of the genomic regions corresponding to repeat units of each class. Polymorphic nucleotides are colored according to the type of RIP mutation detected. Black: invariant nucleotide; red: CpA↔TpA or TpG↔TpA mutations; dark blue: CpC↔TpC or GpG↔GpA mutations; green: CpG↔TpG or CpG↔CpA mutations; turquoise blue: CpT↔TpT or ApG↔ApA mutations. The lower panel of each output shows the frequency plot of the RIP mutations in accordance with the multiple alignment shown above over a rolling sequence window. Nucleotide polymorphisms are color-coded as in the upper panel.

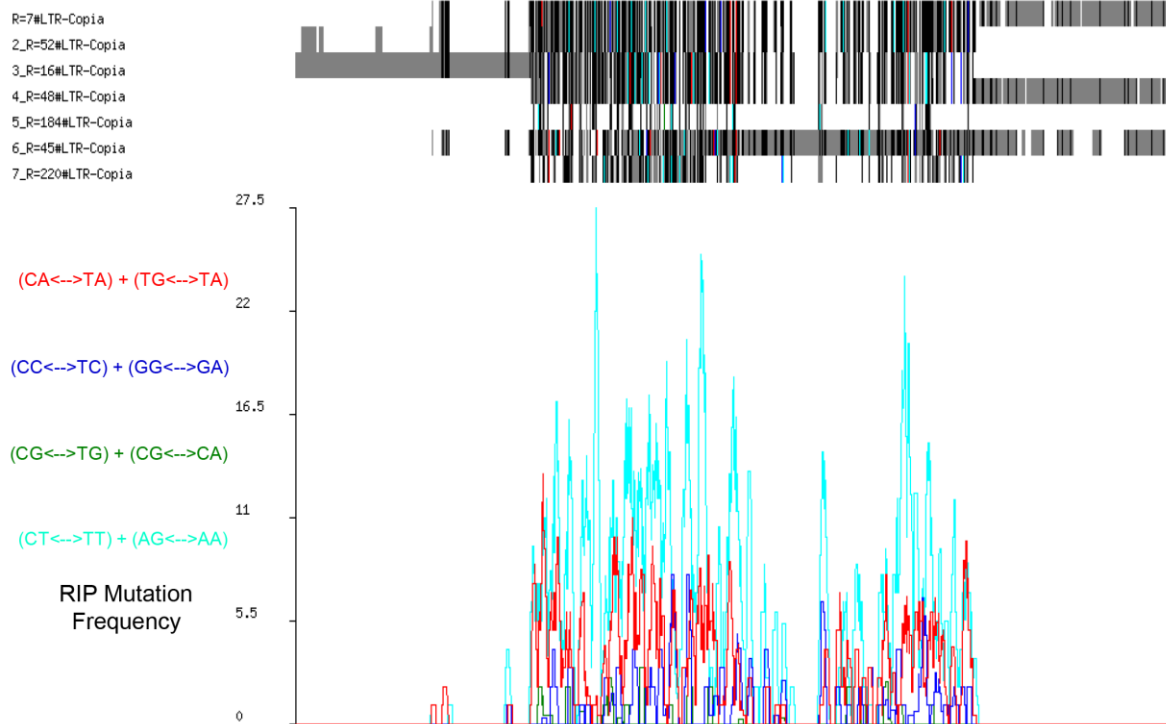

**Supplementary Figure 8. RIP mutation in *Copia* class of LTR retrotransposons shown as RIPCAL output.** The upper panel of output shows multiple alignment of the genomic regions corresponding to repeat units of each class. Polymorphic nucleotides are colored according to the type of RIP mutation detected. The lower panel of each output shows the frequency plot of the RIP mutations in accordance with the multiple alignment shown above over a rolling sequence window. Nucleotide polymorphisms are color-coded as in the upper panel.

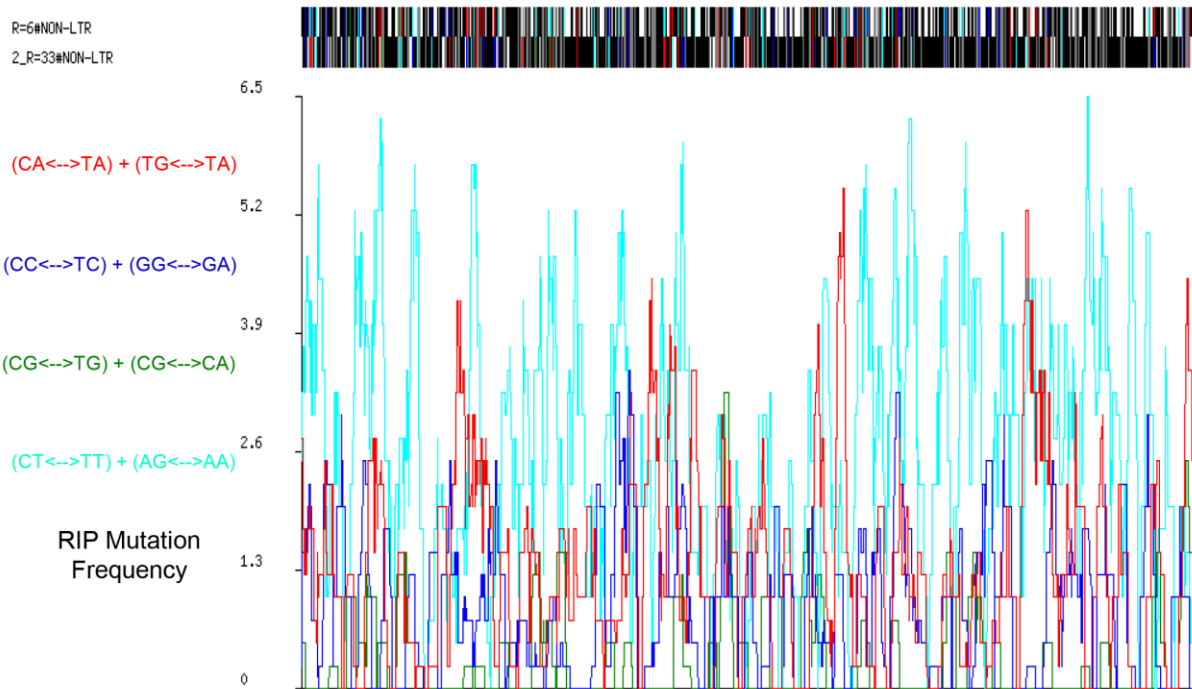

**Supplementary Figure 9.** RIP mutation in Tad1 class of non-LTR retrotransposons shown as RIPCAL output.

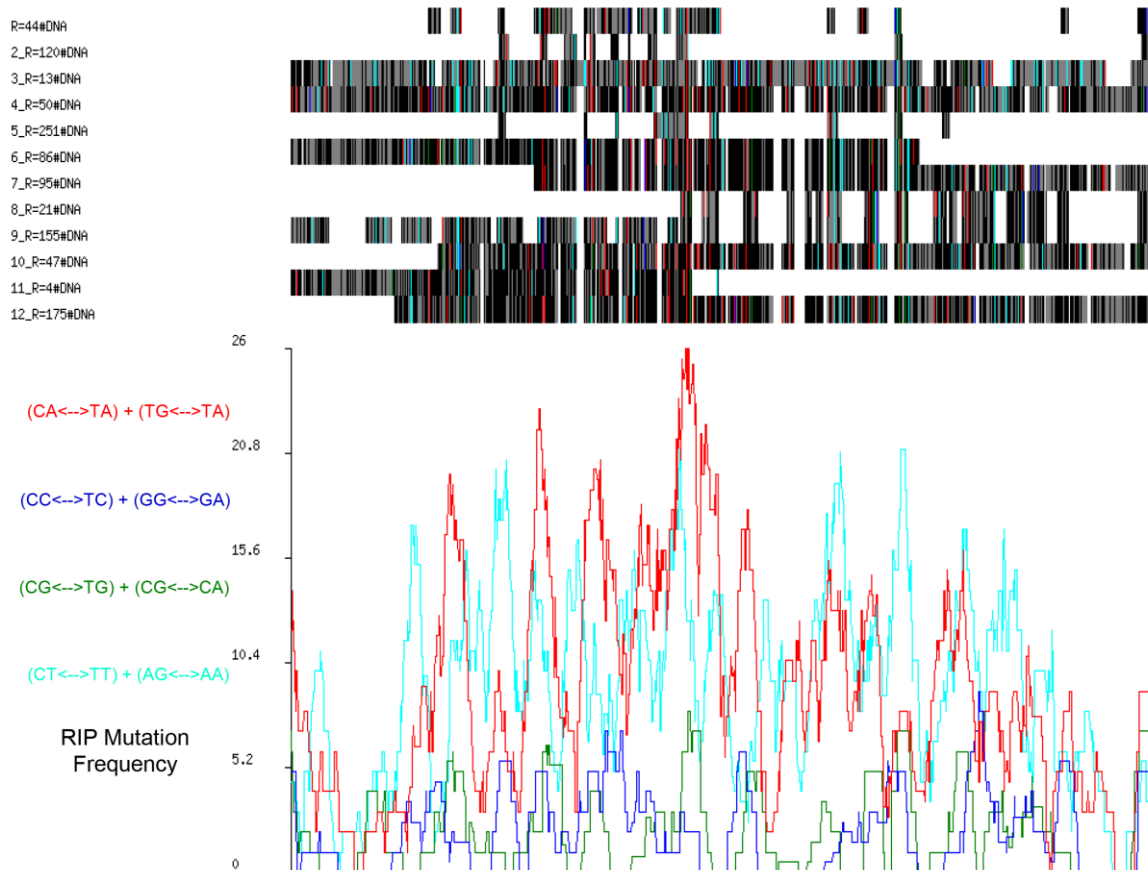

**Supplementary Figure 10.** RIP mutation in Tc1-Mariner class of DNA transposons shown as RIPCAL output.

101\_001Methuensec101  
 102\_002Methuensec102  
 103\_003Methuensec103  
 104\_004Methuensec104  
 105\_005Methuensec105  
 106\_006Methuensec106  
 107\_007Methuensec107  
 108\_008Methuensec108  
 109\_009Methuensec109  
 110\_010Methuensec110  
 111\_011Methuensec111  
 112\_012Methuensec112  
 113\_013Methuensec113  
 114\_014Methuensec114  
 115\_015Methuensec115  
 116\_016Methuensec116  
 117\_017Methuensec117  
 118\_018Methuensec118  
 119\_019Methuensec119  
 120\_020Methuensec120  
 121\_021Methuensec121  
 122\_022Methuensec122  
 123\_023Methuensec123  
 124\_024Methuensec124  
 125\_025Methuensec125  
 126\_026Methuensec126  
 127\_027Methuensec127  
 128\_028Methuensec128  
 129\_029Methuensec129  
 130\_030Methuensec130  
 131\_031Methuensec131  
 132\_032Methuensec132  
 133\_033Methuensec133  
 134\_034Methuensec134  
 135\_035Methuensec135  
 136\_036Methuensec136  
 137\_037Methuensec137  
 138\_038Methuensec138  
 139\_039Methuensec139  
 140\_040Methuensec140  
 141\_041Methuensec141  
 142\_042Methuensec142  
 143\_043Methuensec143  
 144\_044Methuensec144  
 145\_045Methuensec145  
 146\_046Methuensec146  
 147\_047Methuensec147  
 148\_048Methuensec148  
 149\_049Methuensec149  
 150\_050Methuensec150  
 151\_051Methuensec151  
 152\_052Methuensec152  
 153\_053Methuensec153  
 154\_054Methuensec154  
 155\_055Methuensec155  
 156\_056Methuensec156  
 157\_057Methuensec157  
 158\_058Methuensec158  
 159\_059Methuensec159  
 160\_060Methuensec160  
 161\_061Methuensec161  
 162\_062Methuensec162  
 163\_063Methuensec163  
 164\_064Methuensec164  
 165\_065Methuensec165  
 166\_066Methuensec166  
 167\_067Methuensec167  
 168\_068Methuensec168  
 169\_069Methuensec169  
 170\_070Methuensec170  
 171\_071Methuensec171  
 172\_072Methuensec172  
 173\_073Methuensec173  
 174\_074Methuensec174  
 175\_075Methuensec175  
 176\_076Methuensec176  
 177\_077Methuensec177  
 178\_078Methuensec178  
 179\_079Methuensec179  
 180\_080Methuensec180  
 181\_081Methuensec181  
 182\_082Methuensec182  
 183\_083Methuensec183  
 184\_084Methuensec184  
 185\_085Methuensec185  
 186\_086Methuensec186  
 187\_087Methuensec187  
 188\_088Methuensec188  
 189\_089Methuensec189  
 190\_090Methuensec190  
 191\_091Methuensec191  
 192\_092Methuensec192  
 193\_093Methuensec193  
 194\_094Methuensec194  
 195\_095Methuensec195  
 196\_096Methuensec196  
 197\_097Methuensec197  
 198\_098Methuensec198  
 199\_099Methuensec199  
 200\_100Methuensec200

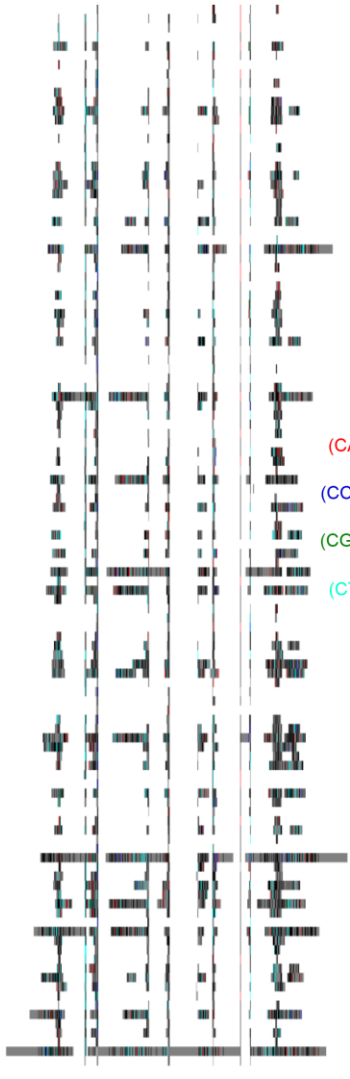

- (CA<->TA) + (TG<->TA)
- (CC<->TC) + (GG<->GA)
- (CG<->TG) + (CG<->CA)
- (CT<->TT) + (AG<->AA)

RIP  
Mutation  
Frequency

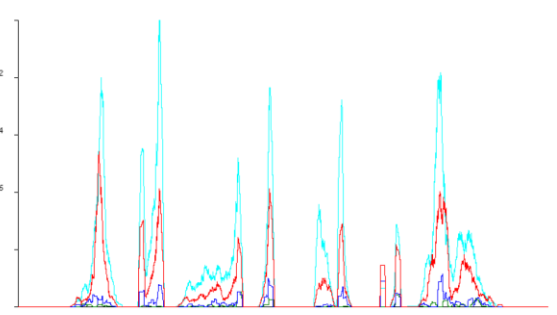

**Supplementary Figure 11. RIP mutation in unclassified transposable elements shown as RIPCAL output. RIP mutation is shown for the unclassified repeat sequences.**

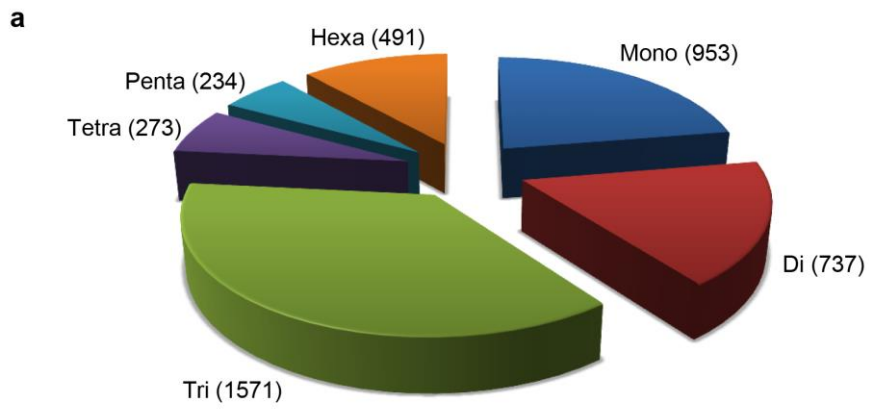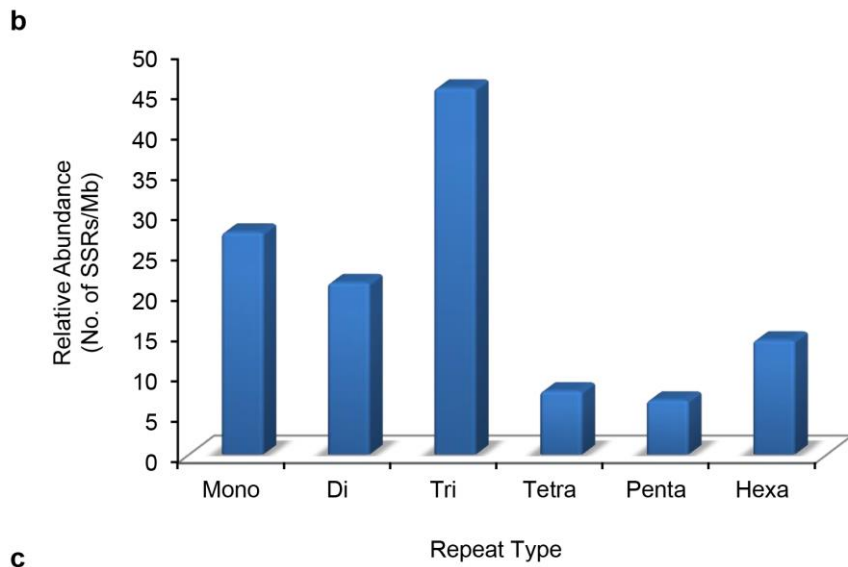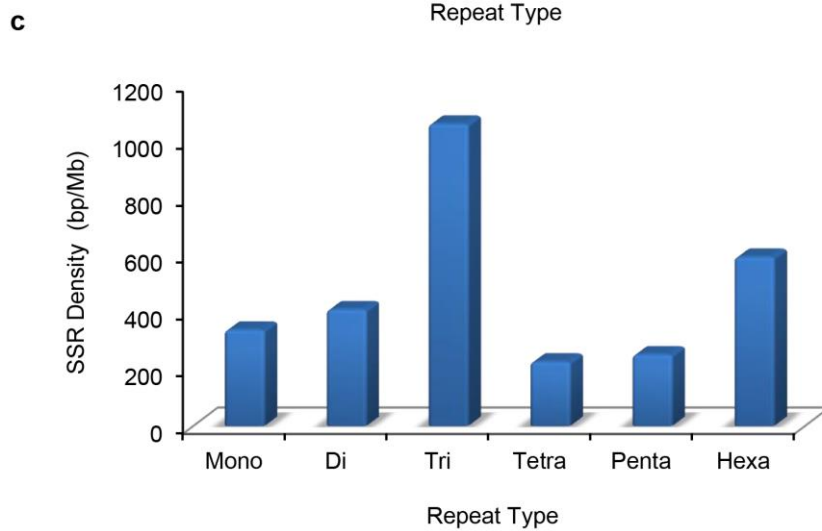

**Supplementary Figure 12. SSRs across the genome of *A. rabiei*.** (a) The total numbers of mono-, di-, tri-, tetra-, penta- and hexa-nucleotide SSRs present in the genome are shown.

Tri-nucleotide SSRs are the most dominant type of SSRs, whereas penta-nucleotide SSRs are least abundant. The total number of each SSR is shown in parenthesis. The SSRs were identified in the genome using MicroSATellite identification tool (MISA). **(b)** Relative abundance of SSRs across the *A. rabiei* genome is shown. Abundance is the total number of SSRs present per Mb of sequence analyzed. The tri-nucleotide repeat showed the highest relative abundance, while the penta-nucleotide repeat showed the lowest relative abundance. **(c)** Relative density of SSRs is shown. Density is the total sequence length (bp) contributed by each SSR per Mb of DNA of the analyzed sequence. The tri-nucleotide repeat showed the highest relative density, whereas the tetra-nucleotide repeat showed the lowest relative density.

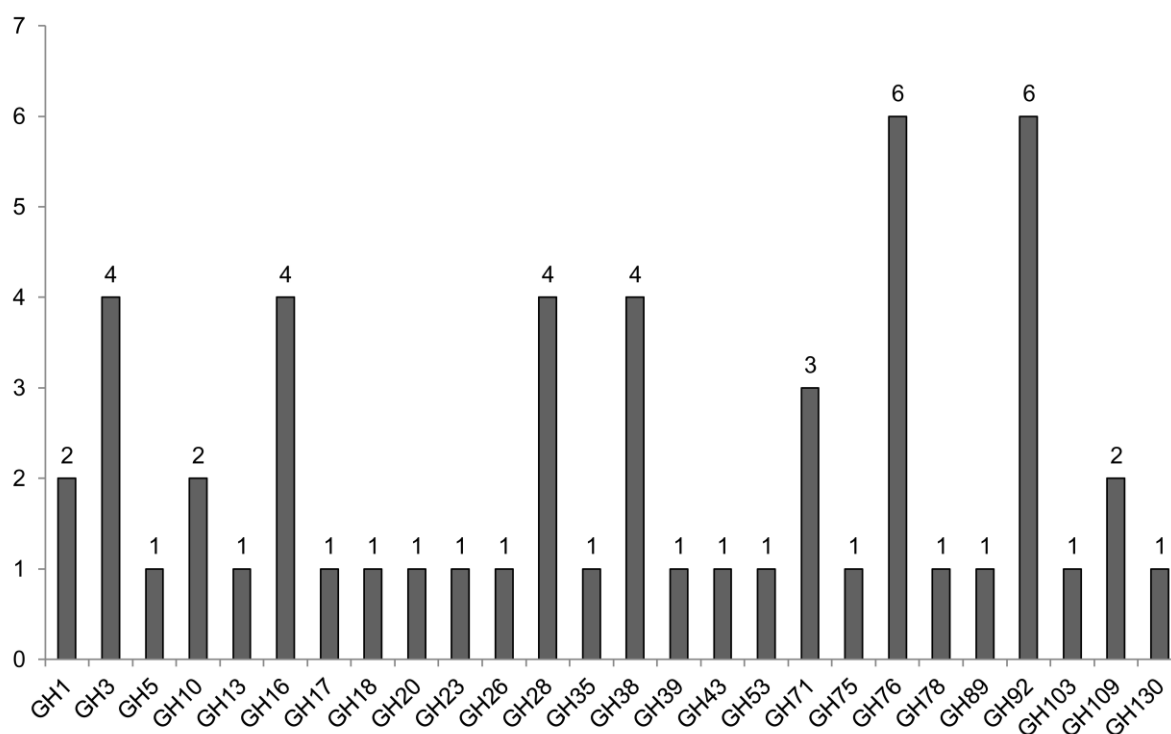

**Supplementary Figure 13. The GHs present in gene families unique to *A. rabiei*.** The bars represent the number of distinct GHs present in the 693 gene families that are unique to *A. rabiei* when compared to other closely related necrotrophic fungi i.e. *C. heterostrophus*, *P. tritici-repentis* and *S. nodorum*. The enzyme classes are indicated by codes that are defined by the CAZyme database.



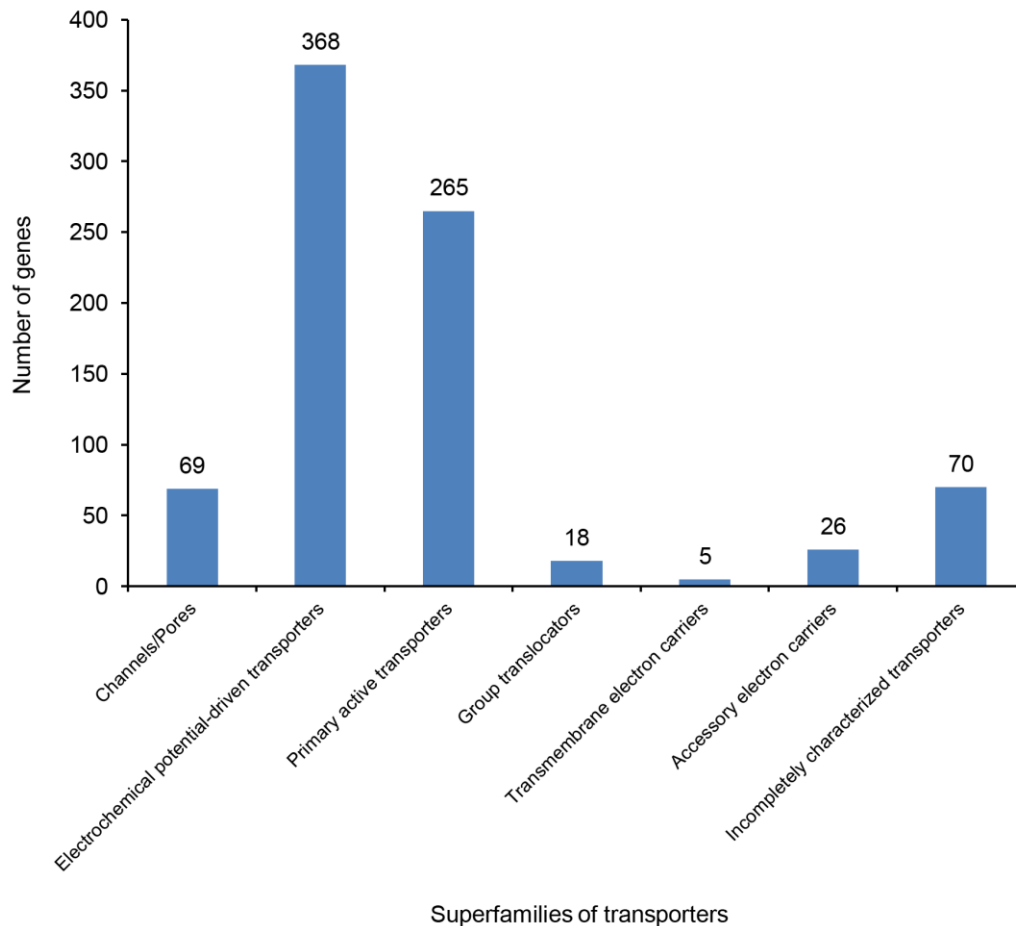

**Supplementary Figure 14. Transporters identified in the *A. rabiei* genome.** The identification and classification of transporters were performed based on similarity searches against the Transporter Classification Database (TCDB). The identified transporters were classified into seven distinct superfamilies, i.e., channels/pores, electrochemical potential-driven transporters, primary active transporters, group translocators, transmembrane electron carriers, accessory electron carriers and incompletely characterized transporters. The most abundant transporters belonged to the electrochemical potential-driven superfamily, followed by primary active transporters.

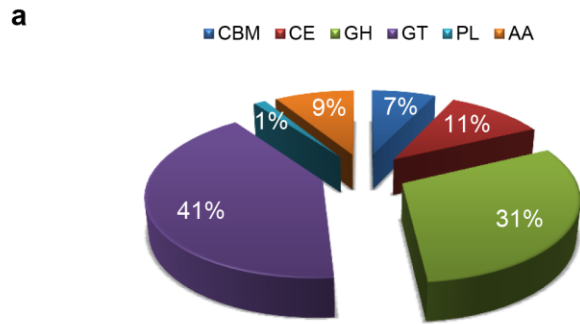

**b**

Legend: GH76, GH92, GH28, GH18, GH3, Others

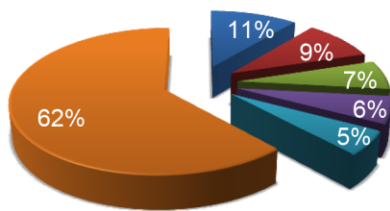

**Glycosyl Hydrolases**

Legend: CBM50, CBM48, CBM13, CBM1, CBM32, Others

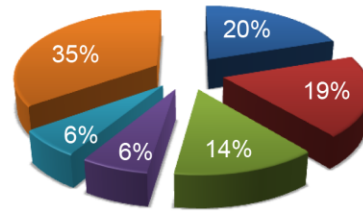

**Carbohydrate-Binding Modules**

Legend: CE10, CE11, CE4, CE9, CE1, CE5, Others

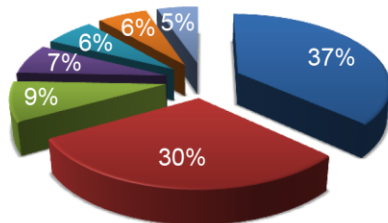

**Carbohydrate Esterases**

Legend: PL1, PL3, PL4

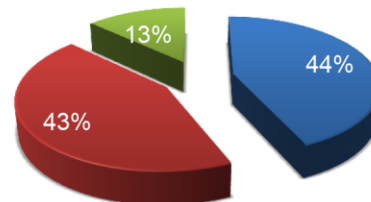

**Polysaccharide Lyases**

Legend: AA3, AA7, AA9, AA6, AA1, Others

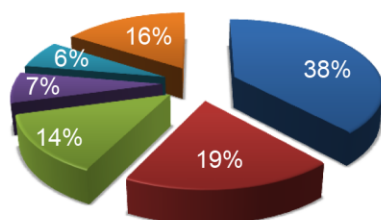

**Auxiliary Activities**

Legend: GT48, GT2, GT34, GT4, GT41, Others

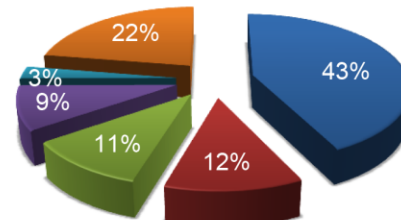

**Glycosyl Transferases**

**Supplementary Figure 15. Carbohydrate-active enzyme (CAZyme) functional annotations of *A. rabiei* predicted genes.** (a) Summary displayed for the six CAZyme categories: carbohydrate-binding modules (CBMs), carbohydrate esterases (CEs), glucoside hydrolases (GHs), glycosyl transferases (GTs), polysaccharide lyases (PLs) and auxiliary activities (AAs). (b) Distinct summaries of each of the CAZyme category representing the most abundant CAZyme classes. The prediction of CAZymes from the predicted genes of *A. rabiei* and their classification were performed using tools from the Carbohydrate-Active EnZymes (CAZyme) database.

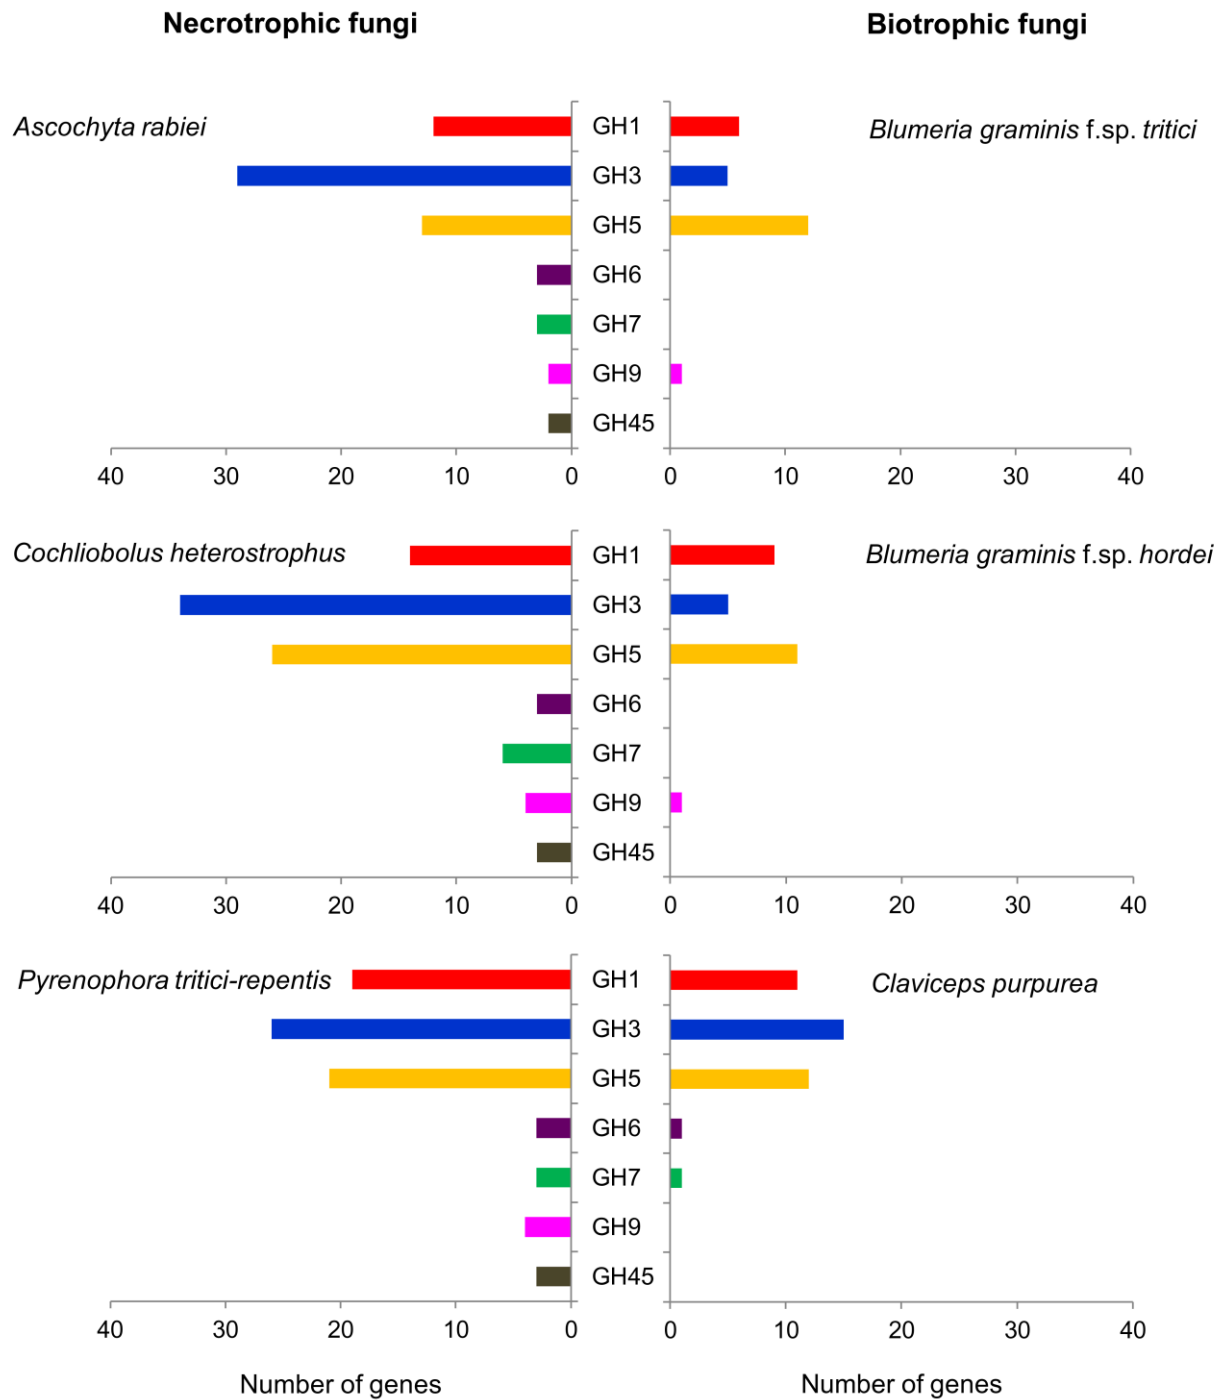

**Supplementary Figure 16. Diversity of genes encoding CAZymes involved in cellulose degradation in *A. rabiei*, related necrotrophic fungi and biotrophic fungi.** The bars are representing the number of cellulose degrading enzymes present in the genomes of six fungi.

On the left side, the necrotrophic fungi: *A. rabiei*, *C. heterostrophus* and *P. tritici-repentis* are shown. Whereas on right side, the biotrophic fungi: *Blumeria graminis* f.sp. *tritici*, *Blumeria graminis* f.sp. *hordei* and *Claviceps purpurea* are presented. The enzyme classes are indicated by codes that are defined by the CAZyme database.

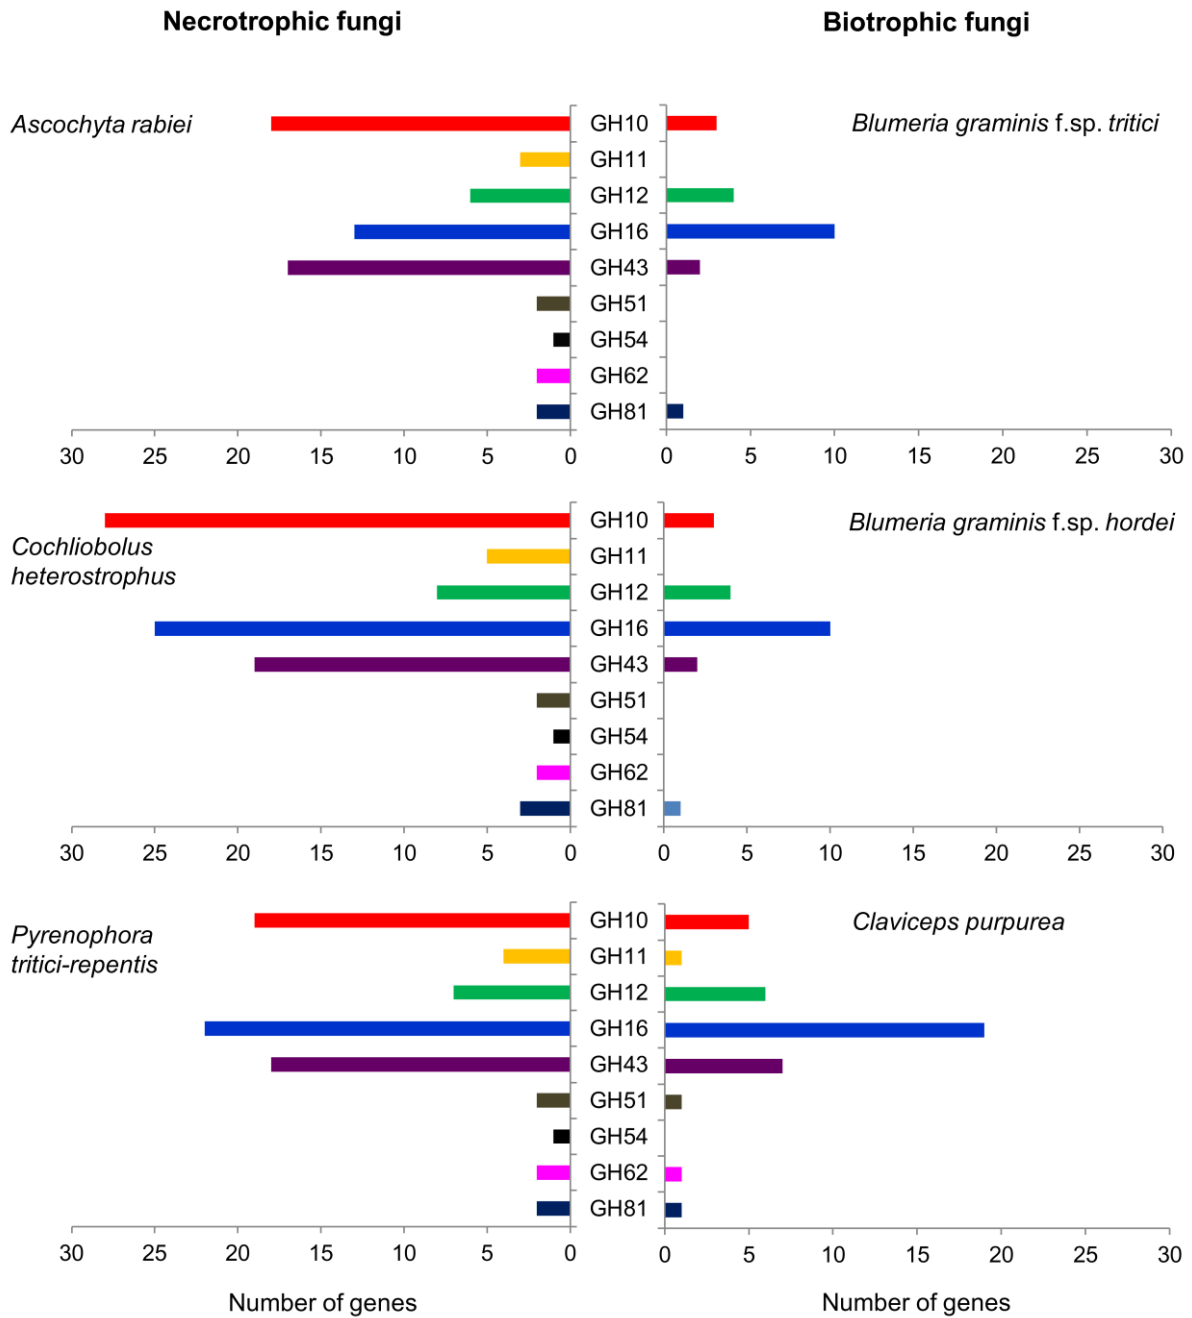

**Supplementary Figure 17. Diversity of genes encoding CAZymes involved in hemicellulose degradation in *A. rabiei*, related necrotrophic fungi and biotrophic fungi.**

The bars are representing the number of hemicellulose degrading enzymes present in the genomes of six fungi. On the left side, the necrotrophic fungi: *A. rabiei*, *C. heterostrophus*

and *P. tritici-repentis* are shown. Whereas on right side, the biotrophic fungi: *Blumeria graminis* f.sp. *tritici*, *Blumeria graminis* f.sp. *hordei* and *Claviceps purpurea* are presented. The enzyme classes are indicated by codes that are defined by the CAZyme database.

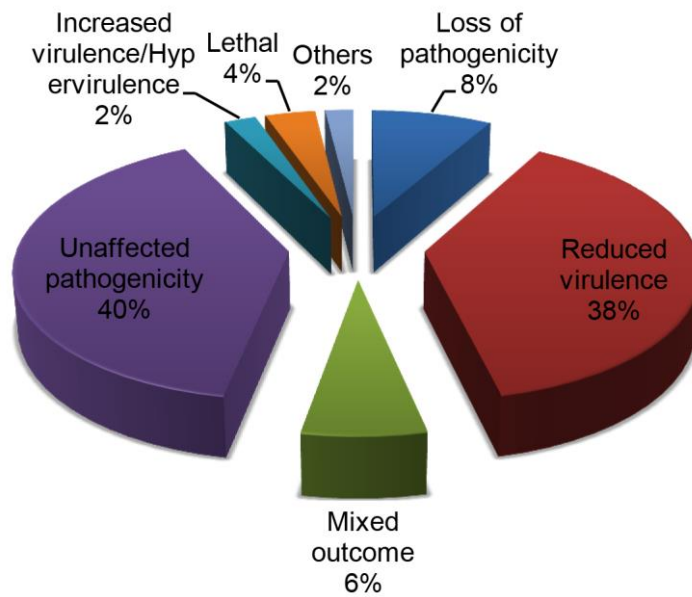

**Supplementary Figure 18. Classification of *A. rabiei* genes based on the Pathogen-Host Interaction database (PHI-base).** The orthologs of the PHI-base genes were predicted in *A. rabiei* using BLASTP search. Different mutant phenotypic categories of the PHI-base orthologs are shown. Almost 38% of the orthologs exhibited reduced virulence as their mutant phenotype, and 8% of mutants showed complete loss of pathogenicity.



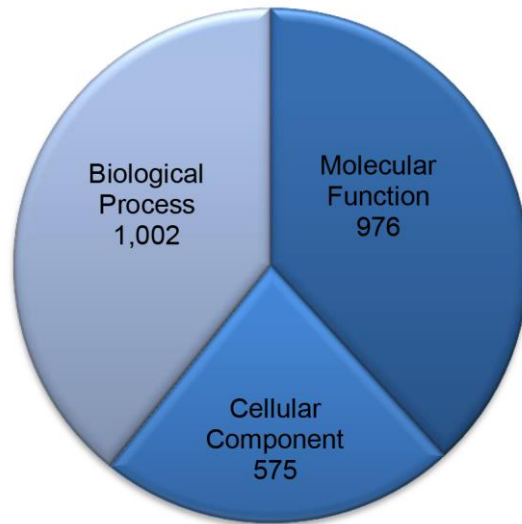

**Supplementary Figure 19. Gene Ontology functional annotations of *A. rabiei* genes predicted to involve in pathogenicity by PHI-base.** GO classification was performed for the genes that were predicted by PHI-base to function in pathogenicity. Classification was performed based on similarity searches against the NCBI non-redundant database using BLAST2GO software. In total, 1,002 genes were assigned GO terms in the biological process category; however, 976 and 575 genes were assigned GO terms in the molecular function and cellular component categories, respectively.

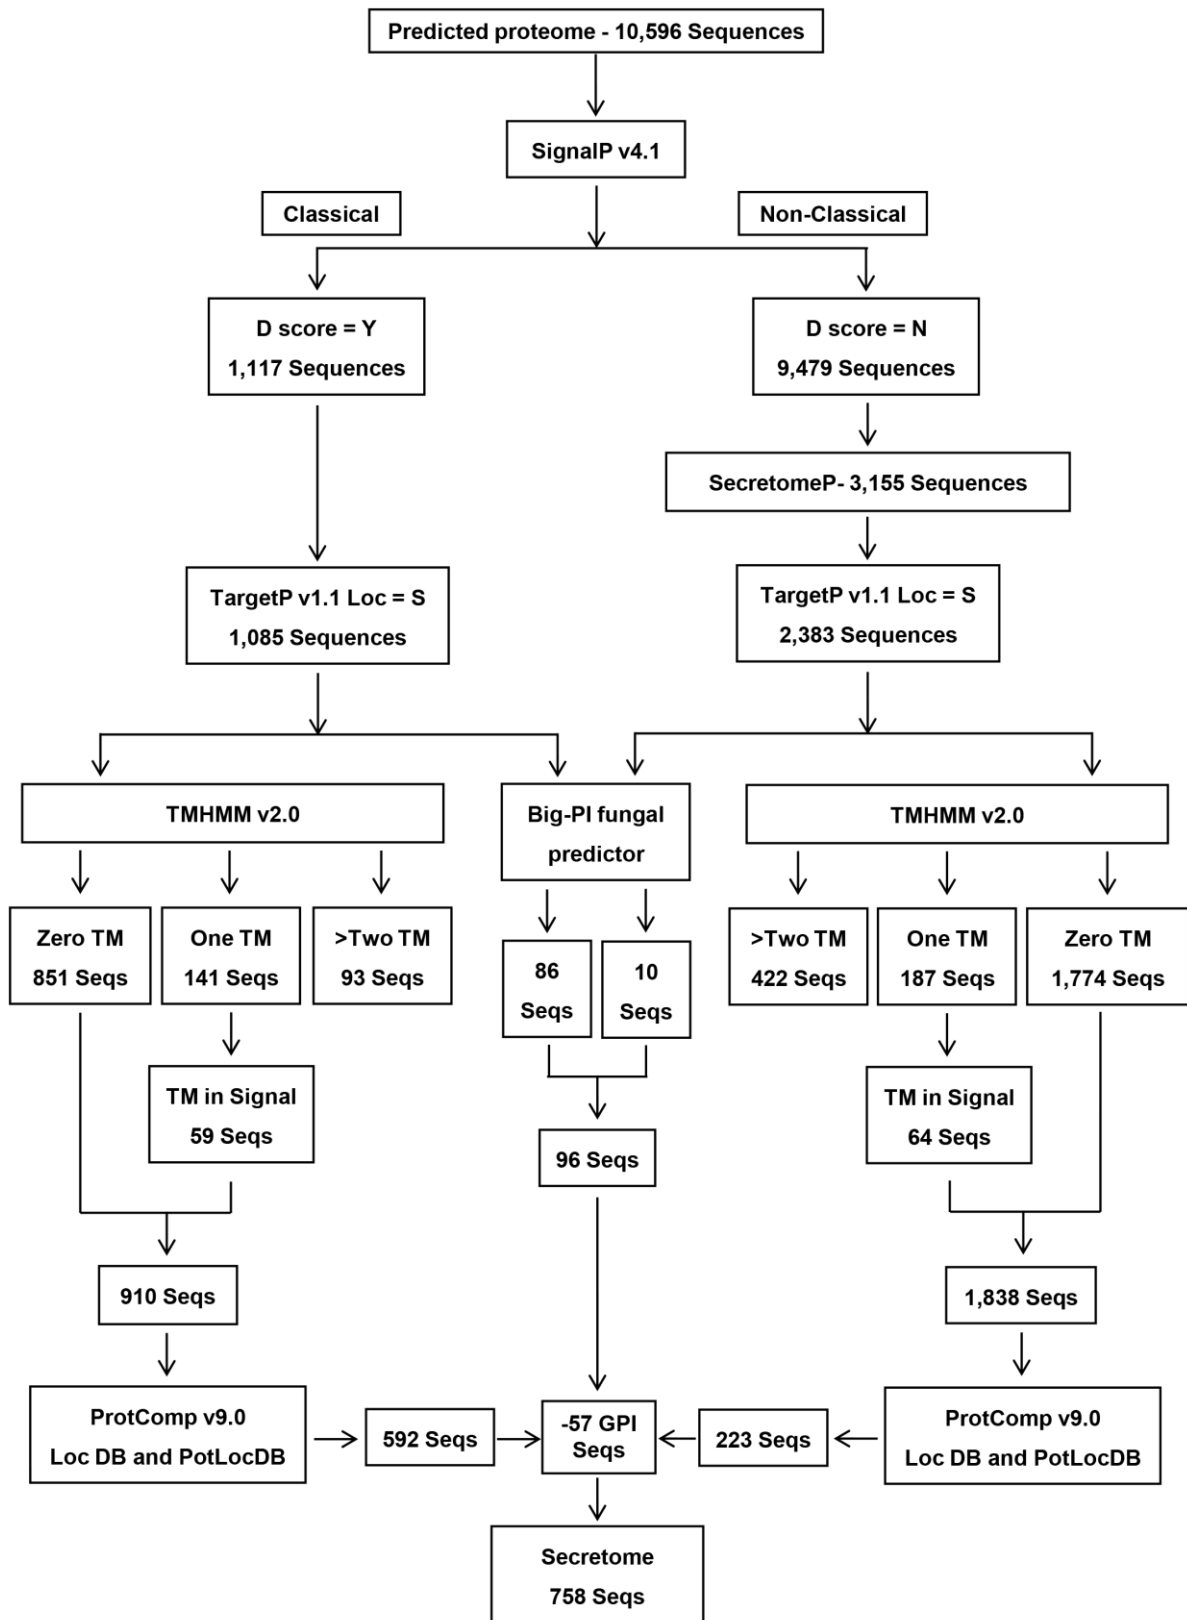

**Figure 20. Overview of the computational pipeline used to identify the secretome of *A. rabiei*.** Two approaches were used simultaneously to predict both the classical and non-classical secreted effector proteins of *A. rabiei*. In total, 758 proteins were predicted in the secretome of *A. rabiei*.

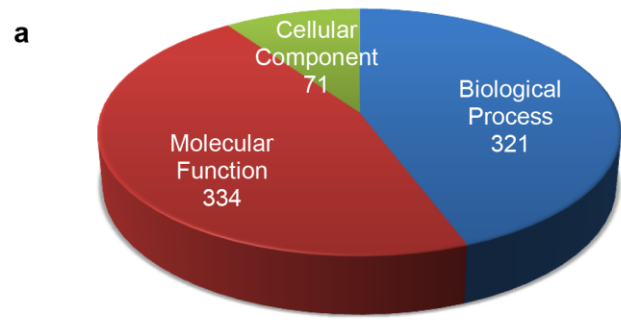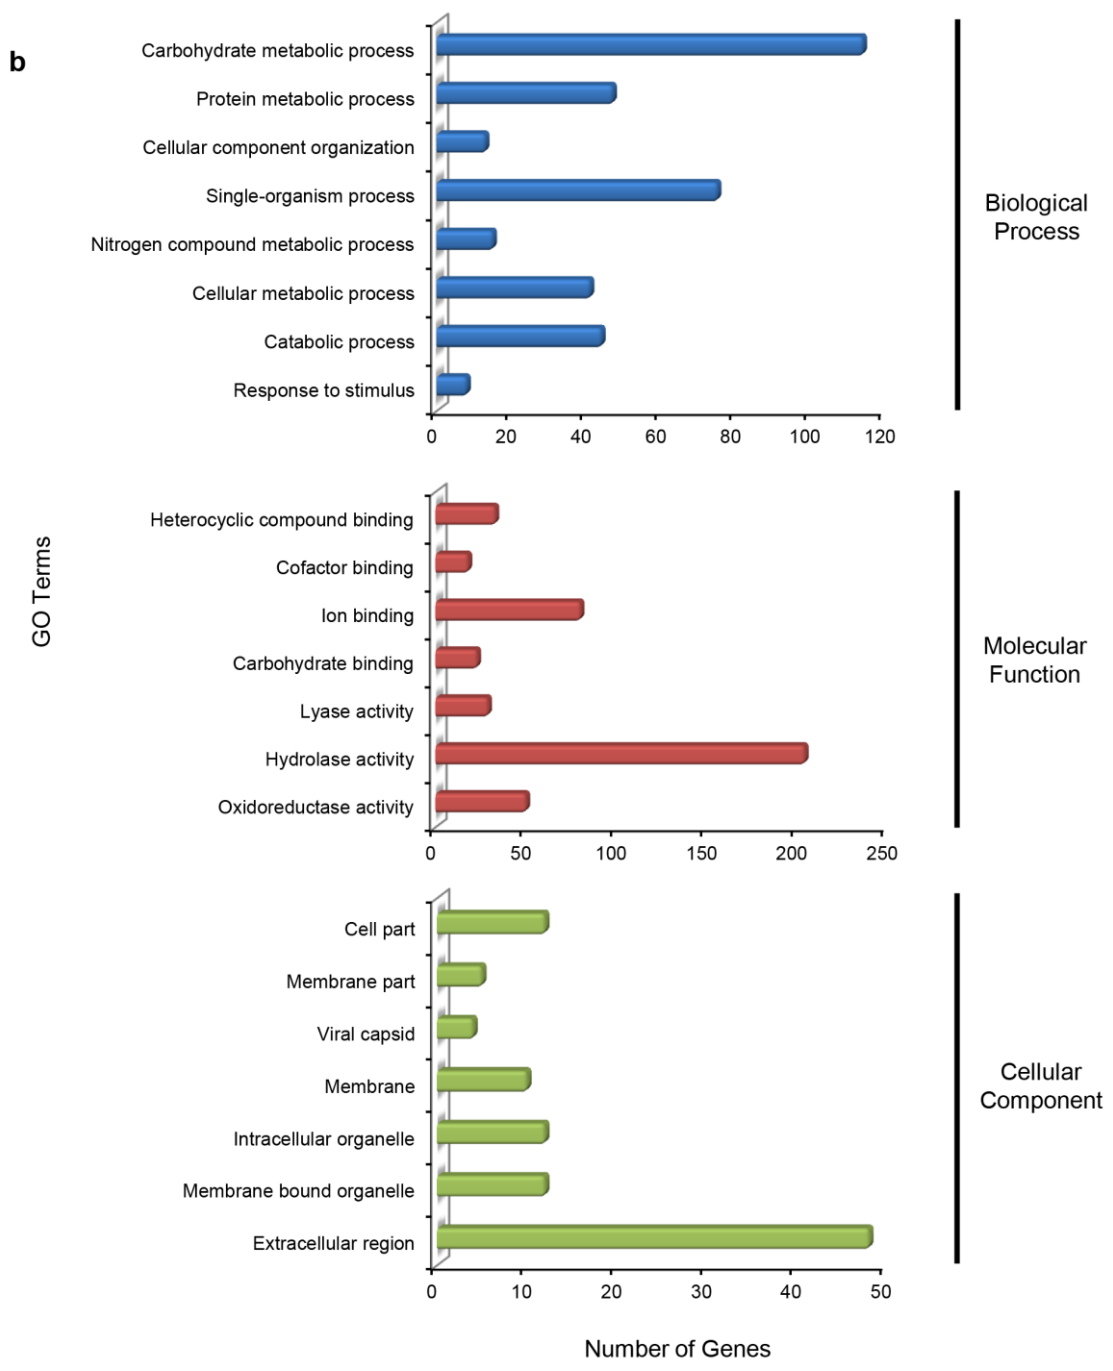

**Supplementary Figure 21. Gene Ontology functional annotation of the *A. rabiei* predicted secretome.** GO terms were assigned to the protein-coding genes of the *A. rabiei* secretome based on similarity searches against the NCBI non-redundant database using BLAST2GO software. **(a)** Based on significant GO terms, the genes were enriched into three primary GO categories: biological process, molecular function and cellular component. In total, 334 genes were assigned GO terms in the molecular function category; however, 321 and 71 genes were assigned GO terms in the biological process and cellular component categories, respectively. **(b)** Different terms under each GO category are displayed. The major 8 categories in biological process and 7 categories each in molecular function and cellular component are shown. The *x*-axis represents the number of genes in a functional group, and *y*-axis represents the GO terms.

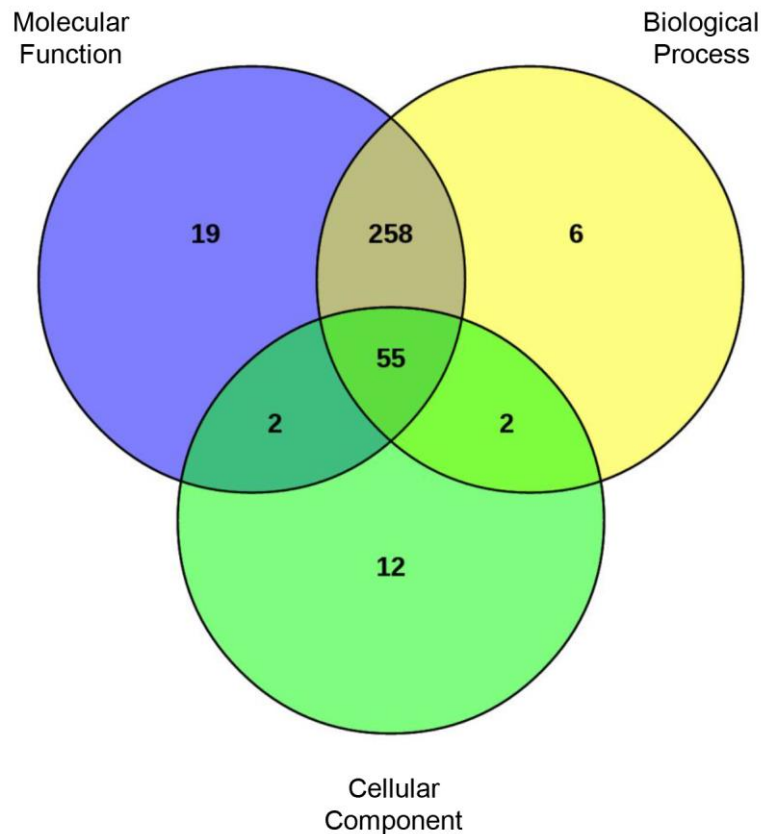

**Supplementary Figure 22. Gene Ontology functional annotation of the protein-coding genes of the *A. rabiei* secretome.** The GO classification was performed based on similarity searches against the NCBI non-redundant database using BLAST2GO software. In total, 354 genes (46.7% of secretome) were assigned GO terms in three primary categories. The Venn diagram shows protein-coding genes of the *A. rabiei* secretome with unique and shared GO terms. Approximately 55 genes were assigned GO terms in all three categories, i.e., molecular function, biological process and cellular component. However, only 19, 6 and 12 genes had GO terms unique to molecular function, biological process and cellular component, respectively. In total, 258 genes shared GO terms in molecular function and biological process categories.

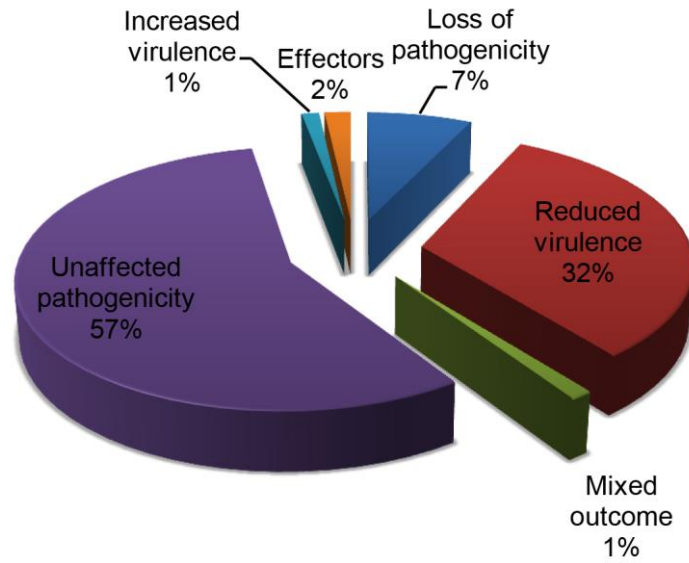

**Supplementary Figure 23. Classification of the *A. rabiei* secretome based on the Pathogen-Host Interaction database (PHI-base).** The orthologs of the PHI-base genes were predicted in the *A. rabiei* secretome using BLASTP search. Different mutant phenotypic categories of the PHI-base orthologs are shown. Approximately 57% of the identified orthologs showed mutant phenotypes of unaffected pathogenicity. However, almost 32% of the orthologs exhibited reduced virulence as their mutant phenotype, and 7% mutants showed complete loss of pathogenicity.

**Supplementary Table 1.** Description of libraries prepared for *A. rabiei* genome sequencing.

|          | <b>Library Type</b> | <b>Size</b> |
|----------|---------------------|-------------|
| Phase I  | Paired-end library  | 200 bp      |
|          | Paired-end library  | 300 bp      |
|          | Paired-end library  | 500 bp      |
| Phase II | Paired-end library  | 200-500 bp  |

**Supplementary Table 2.** Description of *A. rabiei* genome assembly.

| <b>Features</b>              | <b><i>A. rabiei</i></b> |
|------------------------------|-------------------------|
| Scaffold count               | 338                     |
| Scaffold total length (bp)   | 34,658,250              |
| Scaffold minimum length (bp) | 20,024                  |
| Scaffold maximum length (bp) | 1,160,210               |
| Scaffold average length (bp) | 102,539.2               |
| Scaffold N50 (bp)            | 154,808                 |
| Scaffold N90 (bp)            | 42,962                  |

**Supplementary Table 3.** The *A. rabiei* predicted genes indicating the hits obtained from various public databases.

|                    |                       |
|--------------------|-----------------------|
| <b>Total genes</b> | <b>10,596</b>         |
| Nr                 | 9,248 (87.27%)        |
| GO                 | 5,511 (52.01%)        |
| KEGG               | 3,424 (32.31%)        |
| Pfam               | 7,118 (67.18%)        |
| CAZymes            | 1,727 (16.30%)        |
| PHI                | 2,707 (25.55%)        |
| <b>Total</b>       | <b>9,452 (89.20%)</b> |

The numbers in the parentheses shows the percentages of the genes having significant hits in the respective databases (E-value < 1e-5).



**Supplementary Table 4.** The tRNA genes identified in *A. rabiei* along with their respective anticodons.

| <b>Amino Acid</b>   | <b>Anticodons</b> |        |        |        |        |        |
|---------------------|-------------------|--------|--------|--------|--------|--------|
| Alanine: 7          | AGC: 6            | GGC: 0 | CGC: 0 | TGC: 1 |        |        |
| Arginine: 6         | ACG: 0            | GCG: 0 | CCG: 1 | TCG: 2 | CCT: 2 | TCT: 1 |
| Asparagine: 4       | ATT: 0            | GTT: 4 |        |        |        |        |
| Aspartate: 6        | ATC: 0            | GTC: 6 |        |        |        |        |
| Cysteine: 1         | ACA: 1            | GCA: 0 |        |        |        |        |
| Glutamate: 9        |                   |        | CTC: 6 | TTC: 3 |        |        |
| Glutamine: 1        |                   |        | CTG: 1 | TTG: 0 |        |        |
| Glycine: 13         | ACC: 0            | GCC: 9 | CCC: 2 | TCC: 2 |        |        |
| Histidine: 1        | ATG: 0            | GTG: 1 |        |        |        |        |
| Isoleucine: 7       | AAT: 6            | GAT: 0 |        | TAT: 1 |        |        |
| Leucine: 8          | AAG: 5            | GAG: 0 | CAG: 2 | TAG: 0 | CAA: 0 | TAA: 1 |
| Lysine: 8           |                   |        | CTT: 6 | TTT: 2 |        |        |
| Methionine: 6       |                   |        | CAT: 6 |        |        |        |
| Phenylalanine: 4    | AAA: 0            | GAA: 4 |        |        |        |        |
| Proline: 1          | AGG: 0            | GGG: 0 | CGG: 0 | TGG: 1 |        |        |
| Serine: 11          | AGA: 4            | GGA: 0 | CGA: 2 | TGA: 2 | ACT: 0 | GCT: 3 |
| Threonine: 10       | AGT: 5            | GGT: 0 | CGT: 3 | TGT: 2 |        |        |
| Tryptophan: 3       |                   |        | CCA: 3 |        |        |        |
| Tyrosine: 4         | ATA: 0            | GTA: 4 |        |        |        |        |
| Valine: 8           | AAC: 6            | GAC: 0 | CAC: 1 | TAC: 1 |        |        |
| Selenocysteine: 2   |                   |        |        | TCA: 2 |        |        |
| Supressor tRNAs: 2  |                   |        | CTA: 1 | TTA: 1 |        |        |
| Unknown istoypes: 2 |                   |        |        |        |        |        |
| Pseudo-tRNAs: 1     |                   |        |        |        |        |        |
| Total tRNAs: 125    |                   |        |        |        |        |        |

tRNAs with introns: 94

Transfer RNAs were predicted using tRNAscan-SE with standard settings.

**Supplementary Table 5.** Classification of transposable elements by TEclass.

| <b>Category</b> | <b>Numbers</b> |
|-----------------|----------------|
| DNA Transposons | 38             |
| LTRs            | 72             |
| LINEs           | 1              |
| SINEs           | 6              |
| Unclassified    | 38             |

**Supplementary Table 6.** Summary of transposable elements of *A. rabiei*.

| <b>TEs Type</b>                                             | <b>TEs Annotation</b> | <b>Number of Families</b> | <b>Number of Elements</b> | <b>Length Occupied (bp)</b> | <b>% of Genome Coverage</b> |
|-------------------------------------------------------------|-----------------------|---------------------------|---------------------------|-----------------------------|-----------------------------|
| <b>Long Terminal Repeats (LTR) Retrotransposons</b>         | Gypsy                 | 19                        | 1,205                     | 1,836,011                   | 5.29%                       |
|                                                             | Copia                 | 7                         | 464                       | 565,013                     | 1.93%                       |
| <b>Non Long Terminal Repeats (non-LTR) Retrotransposons</b> | Tad1                  | 2                         | 194                       | 209,657                     | 0.60%                       |
| <b>DNA Transposons</b>                                      | Tcl-Mariner           | 12                        | 800                       | 335,061                     | 0.97%                       |
| <b>Unclassified</b>                                         |                       | 115                       | 1,814                     | 499,597                     | 1.63%                       |
| <b>Total</b>                                                |                       | <b>155</b>                | <b>4,477</b>              | <b>3,445,339</b>            | <b>10.42%</b>               |

**Supplementary Table 7.** Essential components of gene silencing machinery identified in the genome of *A. rabiei* orthologous to *Neurospora crassa* [97].

| Process/<br>Components    | Function                                                                    | <i>A. rabiei</i> <sup>a</sup> | <i>N. crassa</i> <sup>b</sup> | E-<br>value | Identity<br>(%) |
|---------------------------|-----------------------------------------------------------------------------|-------------------------------|-------------------------------|-------------|-----------------|
| RIP                       |                                                                             |                               |                               |             |                 |
| RID (RIP<br>Defective)    | Putative<br>methyltransferase,<br>necessary for RIP                         | ST47_g9657                    | NCU02034.7                    | 2e-54       | 28.67           |
| Dim-5                     | Histone H3-K9<br>methyltransferase,<br>necessary for RIP                    | ST47_g6113                    | NCU04402.7                    | 7e-60       | 38.49           |
| RNA silencing<br>Quelling |                                                                             |                               |                               |             |                 |
| QDE-1                     | RNA-dependent RNA<br>polymerase (RdRP),<br>necessary for quelling           | ST47_g4168                    | NCU07534.7                    | 7e-91       | 29.28           |
| QDE-2                     | Argonaute-like,<br>necessary for quelling                                   | ST47_g3147                    | NCU04730.7                    | 4e-128      | 31.49           |
| QDE-3                     | RecQ family helicase,<br>necessary for quelling                             | ST47_g3770                    | NCU08598.7                    | 0           | 43.73           |
| DCL1                      | Dicer-like protein 1,<br>ATP-dependent<br>helicase, involved in<br>quelling | ST47_g4895                    | NCU08270.7                    | 0           | 41.1            |
| DCL2                      | Dicer-like protein 2,<br>ATP-dependent<br>helicase, involved in<br>quelling | ST47_g10058                   | NCU06766.7                    | 5e-132      | 37.14           |
| QIP                       | QDE-2-interacting<br>protein, involved in                                   | ST47_g3703                    | NCU00076.7                    | 6e-63       | 31.08           |

|                 |                                                                                |            |            |        |       |
|-----------------|--------------------------------------------------------------------------------|------------|------------|--------|-------|
|                 | quelling                                                                       |            |            |        |       |
| MSUD            | RNA dependent RNA polymerase (RdRP), necessary for MSUD                        | ST47_g9006 | NCU02178.7 | 0      | 36    |
| SAD-1           |                                                                                |            |            |        |       |
| DNA methylation | DNA methyltransferase Heterochromatin Protein 1, necessary for CpN methylation | ST47_g2710 | NCU02247.7 | 5e-110 | 35.38 |
| Dim-2           |                                                                                |            |            |        |       |
| HP1             |                                                                                |            |            |        |       |

<sup>a</sup> GenBank accession number of *N. crassa* genes.

<sup>b</sup> ID of orthologous of *N. crassa* genes in *A. rabiei*.

Abbreviations: RIP, Repeat Induced Point mutation; QDE, Quelling-Defective; MSUD, Meiotic Silencing of Unpaired DNA; SAD, Suppressor of Ascus-Dominance.

**Supplementary Table 8.** MISA results in the genome survey.

| Category                                                  | Numbers         |
|-----------------------------------------------------------|-----------------|
| Total number of scaffolds examined                        | 338             |
| Total size of examined sequences (bp)                     | 34,658,250      |
| Total number of identified SSRs                           | 4,259           |
| Number of SSR containing scaffolds                        | 307             |
| Number of scaffolds containing more than 1 SSR            | 267             |
| Number of SSRs present in compound formation              | 615             |
| Total sequence length of SSRs (bp)                        | 99,476          |
| <b>Relative abundance</b> (No. of SSRs/Mb)                | <b>123.09</b>   |
| <b>Relative density</b> (Sequence length of SSRs (bp)/Mb) | <b>2,875.02</b> |

**Supplementary Table 9.** Number of SSRs and length occupied by them in the genome.

| Repeat Type     | Number of SSRs | Length occupied (bp) |
|-----------------|----------------|----------------------|
| Mononucleotide  | 953            | 11,673               |
| Dinucleotide    | 737            | 14,148               |
| Trinucleotide   | 1571           | 36,684               |
| Tetranucleotide | 273            | 7,792                |
| Pentanucleotide | 234            | 8,665                |
| Hexanucleotide  | 491            | 20,514               |

**Supplementary Table 10.** Number of compound SSRs in the genome.

| Compound SSRs                 | Number       |
|-------------------------------|--------------|
| Total number of compound SSRs | 448          |
| Interrupted SSRs (C)          | 432 (96.43%) |
| Uninterrupted SSRs (C*)       | 16 (3.57%)   |

**Supplementary Table 11.** Most frequent SSR motifs in the genome. The repeat frequency are shown in closed brackets.

| Repeat Unit |                 |                        |                           |                              |
|-------------|-----------------|------------------------|---------------------------|------------------------------|
| Di          | Tri             | Tetra                  | Penta                     | Hexa                         |
| AG<br>(126) | CAC (62)        | ATCA (11)              | TGTGC (6)                 | CCAGCA (9)                   |
| TC<br>(79)  | CAG (58)        | AGGA/ATTA/<br>GATT (8) | CAAAG/CAGCA (4)           | AAGAGA/CAGCAA/<br>GCGTGG (4) |
| GA<br>(75)  | AAG/TGC<br>(55) | TGGA (7)               | ACACC/AGGAA/<br>CACAG (3) | ACCAGC/CAACAG/<br>CATCAC (3) |
| TG<br>(74)  | TCG (52)        | CCAT/GATG/<br>GTGA (6) | AAATC/AACCC/<br>ACAGG (2) | ACCTCG/ACGCCC/<br>ACGGCA (2) |
| AC<br>(73)  | GGT (48)        | ATGA/CTGC<br>(5)       | AAAGA/AAAGC/<br>AACAC (1) | AAAGGG/AACAGC/<br>AACGGA (1) |

**Supplementary Table 12.** List of GHs unique in *A. rabiei* among the selected most closely related *Dothideomycetes* fungi.

| <b>S. No.</b> | <b>Gene ID</b> | <b>GH class</b> |
|---------------|----------------|-----------------|
| 1.            | ST47_g262      | GH38            |
| 2.            | ST47_g763      | GH38            |
| 3.            | ST47_g963      | GH76            |
| 4.            | ST47_g1018     | GH38            |
| 5.            | ST47_g1025     | GH38            |
| 6.            | ST47_g1118     | GH3             |
| 7.            | ST47_g1126     | GH3             |
| 8.            | ST47_g1174     | GH53            |
| 9.            | ST47_g1198     | GH16            |
| 10.           | ST47_g1253     | GH39            |
| 11.           | ST47_g1280     | GH17            |
| 12.           | ST47_g1302     | GH76            |
| 13.           | ST47_g1305     | GH23            |
| 14.           | ST47_g1316     | GH103           |
| 15.           | ST47_g1324     | GH16            |
| 16.           | ST47_g1335     | GH16            |
| 17.           | ST47_g1339     | GH92            |
| 18.           | ST47_g1594     | GH28            |
| 19.           | ST47_g2370     | GH78            |
| 20.           | ST47_g3166     | GH43            |
| 21.           | ST47_g4719     | GH71            |
| 22.           | ST47_g4764     | GH71            |
| 23.           | ST47_g4979     | GH76            |
| 24.           | ST47_g4999     | GH71            |
| 25.           | ST47_g5365     | GH5             |
| 26.           | ST47_g5786     | GH130           |
| 27.           | ST47_g5821     | GH3             |
| 28.           | ST47_g5867     | GH92            |
| 29.           | ST47_g5868     | GH75            |
| 30.           | ST47_g5871     | GH28            |
| 31.           | ST47_g5910     | GH1             |
| 32.           | ST47_g6255     | GH28            |
| 33.           | ST47_g6429     | GH3             |
| 34.           | ST47_g6465     | GH92            |
| 35.           | ST47_g6471     | GH10            |

|     |             |       |
|-----|-------------|-------|
| 36. | ST47_g7065  | GH35  |
| 37. | ST47_g7212  | GH20  |
| 38. | ST47_g7631  | GH28  |
| 39. | ST47_g7698  | GH76  |
| 40. | ST47_g7713  | GH18  |
| 41. | ST47_g7849  | GH89  |
| 42. | ST47_g7853  | GH26  |
| 43. | ST47_g7966  | GH109 |
| 44. | ST47_g8481  | GH13  |
| 45. | ST47_g8635  | GH1   |
| 46. | ST47_g9244  | GH92  |
| 47. | ST47_g9444  | GH76  |
| 48. | ST47_g9629  | GH92  |
| 49. | ST47_g9633  | GH109 |
| 50. | ST47_g9765  | GH92  |
| 51. | ST47_g10073 | GH10  |
| 52. | ST47_g10239 | GH76  |
| 53. | ST47_g10579 | GH16  |

**Supplementary Table 13.** Summary counts of CAZymes content present in 1,458 shared orthologous genes families among the necrotrophic fungi *A. rabiei*, *C. heterostrophus* and *P. tritici-repentis*.

| <b>CAZymes categories and their numbers</b> |            |           |           |            |           |
|---------------------------------------------|------------|-----------|-----------|------------|-----------|
| <b>GH</b>                                   | <b>GT</b>  | <b>CE</b> | <b>PL</b> | <b>CBM</b> | <b>AA</b> |
| GH1 – 2                                     | GT1 – 2    | CE1 – 2   | PL4 – 2   | CBM1 – 2   | AA3 – 8   |
| GH2 – 1                                     | GT2 – 6    | CE3 – 1   |           | CBM2 – 1   | AA6 – 2   |
| GH3 – 3                                     | GT4 – 10   | CE4 – 1   |           | CBM3 – 1   | AA7 – 1   |
| GH4 – 2                                     | GT22 – 1   | CE8 – 1   |           | CBM5 – 2   |           |
| GH5 – 5                                     | GT25 – 3   | CE9 – 3   |           | CBM6 – 1   |           |
| GH9 – 2                                     | GT31 – 2   | CE10 – 3  |           | CBM10 – 1  |           |
| GH10 – 4                                    | GT32 – 2   | CE11 – 2  |           | CBM12 – 3  |           |
| GH13 – 1                                    | GT34 – 10  | CE12 – 4  |           | CBM13 – 6  |           |
| GH15 – 1                                    | GT41 – 2   | CE14 – 1  |           | CBM18 – 1  |           |
| GH16 – 1                                    | GT48 – 103 | CE15 – 1  |           | CBM20 – 2  |           |
| GH17 – 2                                    | GT55 – 2   | CE16 – 2  |           | CBM26 – 1  |           |
| GH18 – 9                                    | GT87 – 3   |           |           | CBM32 – 1  |           |
| GH20 – 3                                    | GT90 – 1   |           |           | CBM35 – 4  |           |

|              |            |           |          |           |           |
|--------------|------------|-----------|----------|-----------|-----------|
| GH24 – 1     |            |           |          | CBM50 – 4 |           |
| GH27 – 3     |            |           |          | CBM63 – 1 |           |
| GH28 – 3     |            |           |          |           |           |
| GH30 – 1     |            |           |          |           |           |
| GH36 – 1     |            |           |          |           |           |
| GH43 – 1     |            |           |          |           |           |
| GH55 – 2     |            |           |          |           |           |
| GH65 – 3     |            |           |          |           |           |
| GH76 – 11    |            |           |          |           |           |
| GH79 – 2     |            |           |          |           |           |
| GH88 – 1     |            |           |          |           |           |
| GH92 – 8     |            |           |          |           |           |
| GH95 – 2     |            |           |          |           |           |
| GH105 – 4    |            |           |          |           |           |
| GH109 – 3    |            |           |          |           |           |
| GH131 – 2    |            |           |          |           |           |
|              |            |           |          |           |           |
| <b>Total</b> |            |           |          |           |           |
| <b>84</b>    | <b>147</b> | <b>21</b> | <b>2</b> | <b>31</b> | <b>11</b> |

**Supplementary Table 14.** Summary counts of CAZymes content present in 112 shared orthologous genes families among the biotrophic fungi *C. purpurea*, *B. graminis* f.sp. *tritici* and *B. graminis* f.sp. *hordei*.

| <b>CAZymes categories and their numbers</b> |           |           |           |            |           |
|---------------------------------------------|-----------|-----------|-----------|------------|-----------|
| <b>GH</b>                                   | <b>GT</b> | <b>CE</b> | <b>PL</b> | <b>CBM</b> | <b>AA</b> |
| GH32 – 2                                    | GT31 – 2  | CE3 – 1   | -         | CBM1 – 1   | AA5 – 1   |
|                                             | GT4 – 2   | CE11 – 1  |           | CBM13 – 1  |           |
|                                             | GT90 – 1  |           |           | CBM50 – 1  |           |
|                                             |           |           |           |            |           |
|                                             |           |           |           |            |           |
| <b>Total</b>                                |           |           |           |            |           |
| <b>2</b>                                    | <b>5</b>  | <b>2</b>  | <b>-</b>  | <b>3</b>   | <b>1</b>  |



**Supplementary Table 15.** Genes encoding transporters in *A. rabiei*.

| Superfamilies                                 | TC No. | Subclass or subfamily description                                           | Number     |
|-----------------------------------------------|--------|-----------------------------------------------------------------------------|------------|
| Channels/Pores                                | 1.A    | Alpha -Type channels                                                        | 55         |
|                                               | 1.B    | Beta-Barrel porins                                                          | 5          |
|                                               | 1.C    | Pore-forming toxins (proteins and peptides)                                 | 3          |
|                                               | 1.F    | Vesicle Fusion Pores                                                        | 5          |
|                                               | 1.G    | Viral Fusion Pores                                                          | 1          |
| Electrochemical potential-driven transporters | 2.A    | Porters (uniporters, symporters, antiporters)                               | <b>368</b> |
|                                               | 2.A.1  | The Major Facilitator Superfamily (MFS)                                     | 165        |
|                                               | 2.A.2  | The Glycoside-Pentoside-Hexuronide (GPH): Cation Symporter Family           | 4          |
|                                               | 2.A.3  | The Amino Acid-Polyamine-Organocation (APC) Superfamily                     | 32         |
|                                               | 2.A.4  | The Cation Diffusion Facilitator (CDF) Family                               | 7          |
|                                               | 2.A.5  | The Zinc (Zn <sup>2+</sup> )-Iron (Fe <sup>2+</sup> ) Permease (ZIP) Family | 6          |
|                                               | 2.A.6  | The Resistance-Nodulation-Cell Division (RND) Superfamily                   | 4          |
|                                               | 2.A.7  | The Drug/Metabolite Transporter (DMT) Superfamily                           | 11         |
|                                               | 2.A.9  | The Cytochrome Oxidase Biogenesis (Oxa1) Family                             | 2          |
|                                               | 2.A.16 | The Tellurite-resistance/Dicarboxylate Transporter (TDT) Family             | 5          |
|                                               | 2.A.17 | The Proton-dependent Oligopeptide Transporter (POT) Family                  | 10         |
|                                               | 2.A.18 | The Amino Acid/Auxin Permease (AAAP) Family                                 | 11         |
|                                               | 2.A.19 | The Ca <sup>2+</sup> :Cation Antiporter (CaCA) Family                       | 8          |

|        |                                                                   |    |
|--------|-------------------------------------------------------------------|----|
| 2.A.20 | The Inorganic Phosphate Transporter (PiT) Family                  | 3  |
| 2.A.21 | The Solute:Sodium Symporter (SSS) Family                          | 7  |
| 2.A.22 | The Neurotransmitter:Sodium Symporter (NSS) Family                | 1  |
| 2.A.29 | The Mitochondrial Carrier (MC) Family                             | 32 |
| 2.A.30 | The Cation-Chloride Cotransporter (CCC) Family                    | 1  |
| 2.A.31 | The Anion Exchanger (AE) Family                                   | 2  |
| 2.A.36 | The Monovalent Cation:Proton Antiporter-1 (CPA1) Family           | 4  |
| 2.A.37 | The Monovalent Cation:Proton Antiporter-2 (CPA2) Family           | 1  |
| 2.A.38 | The K <sup>+</sup> Transporter (Trk) Family                       | 4  |
| 2.A.39 | The Nucleobase:Cation Symporter-1 (NCS1) Family                   | 9  |
| 2.A.40 | The Nucleobase:Cation Symporter-2 (NCS2) Family                   | 1  |
| 2.A.41 | The Concentrative Nucleoside Transporter (CNT) Family             | 1  |
| 2.A.43 | The Lysosomal Cystine Transporter (LCT) Family                    | 2  |
| 2.A.47 | The Divalent Anion:Na <sup>+</sup> Symporter (DASS) Family        | 1  |
| 2.A.49 | The Chloride Carrier/Channel (ClC) Family                         | 4  |
| 2.A.50 | The Glycerol Uptake (GUP) Family                                  | 1  |
| 2.A.51 | The Chromate Ion Transporter (CHR) Family                         | 1  |
| 2.A.52 | The Ni <sup>2+</sup> -Co <sup>2+</sup> Transporter (NiCoT) Family | 2  |
| 2.A.53 | The Sulfate Permease (SulP) Family                                | 6  |
| 2.A.54 | The Mitochondrial Tricarboxylate Carrier (MTC) Family             | 1  |
| 2.A.59 | The Arsenical Resistance-3 (ACR3) Family                          | 1  |
| 2.A.66 | The Multidrug/Oligosaccharidyl-                                   | 5  |

|                             |        |                                                                                                                               |            |
|-----------------------------|--------|-------------------------------------------------------------------------------------------------------------------------------|------------|
|                             |        | lipid/Polysaccharide (MOP) Flippase Superfamily                                                                               |            |
|                             | 2.A.67 | The Oligopeptide Transporter (OPT) Family                                                                                     | 3          |
|                             | 2.A.72 | The K <sup>+</sup> Uptake Permease (KUP) Family                                                                               | 2          |
|                             | 2.A.78 | The Branched Chain Amino Acid Exporter (LIV-E) Family                                                                         | 2          |
|                             | 2.A.89 | The Vacuolar Iron Transporter (VIT) Family                                                                                    | 1          |
|                             | 2.A.94 | The Phosphate Permease (Pho1) Family                                                                                          | 1          |
|                             | 2.A.96 | The YaaH (YaaH) Family                                                                                                        | 3          |
|                             | 2.A.97 | The Mitochondrial Inner Membrane K <sup>+</sup> /H <sup>+</sup> and Ca <sup>2+</sup> /H <sup>+</sup> Exchanger (LetM1) Family | 1          |
| Primary active transporters | 3.A    | P–P-bond-hydrolysis-driven transporters                                                                                       | <b>219</b> |
|                             | 3.A.1  | The ATP-binding Cassette (ABC) Superfamily                                                                                    | 52         |
|                             | 3.A.2  | The H <sup>+</sup> - or Na <sup>+</sup> -translocating F-type, V-type and A-type ATPase (F-ATPase) Superfamily                | 22         |
|                             | 3.A.3  | The P-type ATPase (P-ATPase) Superfamily                                                                                      | 18         |
|                             | 3.A.5  | The General Secretory Pathway (Sec) Family                                                                                    | 17         |
|                             | 3.A.7  | The Type IV (Conjugal DNA-Protein Transfer or VirB) Secretory Pathway (IVSP) Family                                           | 1          |
|                             | 3.A.8  | The Mitochondrial Protein Translocase (MPT) Family                                                                            | 20         |
|                             | 3.A.9  | The Chloroplast Envelope Protein Translocase (CEPT or Tic-Toc) Family                                                         | 8          |
|                             | 3.A.16 | The Endoplasmic Reticular Retrotranslocon (ER-RT) Family                                                                      | 19         |
|                             | 3.A.18 | The Nuclear mRNA Exporter (mRNA-E) Family                                                                                     | 35         |
|                             | 3.A.19 | The TMS Recognition/Insertion Complex (TRC) Family                                                                            | 1          |
|                             | 3.A.20 | The Peroxisomal Protein Importer (PPI)                                                                                        | 26         |

|                                         |        |                                                                                |           |
|-----------------------------------------|--------|--------------------------------------------------------------------------------|-----------|
|                                         |        | Family                                                                         |           |
|                                         | 3.B    | Decarboxylation-driven transporters                                            | 5         |
|                                         | 3.D    | Oxidoreduction-driven transporters                                             | 39        |
|                                         | 3.E    | Light absorption-driven transporters                                           | 2         |
| Group translocators                     | 4.C    | Acyl CoA ligase-coupled transporters                                           | <b>18</b> |
|                                         | 4.C.1  | The Proposed Fatty Acid Group Translocation (FAT) Family                       | 17        |
|                                         | 4.C.2  | The Carnitine O-Acyl Transferase (CrAT) Family                                 | 1         |
| Transmembrane electron carriers         | 5.A    | Transmembrane two-electron transfer carriers                                   | 3         |
|                                         | 5.B    | Transmembrane one-electron transfer carriers                                   | 2         |
| Accessory electron carriers             | 8.A    | Auxiliary transport proteins                                                   | <b>26</b> |
|                                         | 8.A.5  | The Voltage-gated K <sup>+</sup> Channel $\beta$ -subunit (Kv $\beta$ ) Family | 6         |
|                                         | 8.A.11 | The Immunophilin-like Prolyl:Peptidyl Isomerase Regulator (I-PPI) Family       | 1         |
|                                         | 8.A.13 | The Tetratricopeptide Repeat (Tpr1) Family                                     | 1         |
|                                         | 8.A.21 | The Stomatin/Podocin/Band 7/Nephrsis.2/SPFH (Stomatin) Family                  | 2         |
|                                         | 8.A.27 | The CDC50 P-type ATPase Lipid Flippase $\beta$ -Subunit (CDC50) Family         | 1         |
|                                         | 8.A.28 | The Ankyrin (Ankyrin) Family                                                   | 8         |
|                                         | 8.A.30 | The Nedd4-Family Interacting Protein-2 (Nedd4) Family                          | 2         |
|                                         | 8.A.34 | The Endophilin (Endophilin) Family                                             | 5         |
| Incompletely characterized transporters | 9.A    | Recognized transporters of unknown biochemical mechanism                       | <b>44</b> |
|                                         | 9.A.1  | The Non ABC Multidrug Exporter (N-MDE) Family                                  | 3         |

|              |                                                                             |            |
|--------------|-----------------------------------------------------------------------------|------------|
| 9.A.2        | The Endomembrane protein-70 (EMP70) Family                                  | 1          |
| 9.A.6        | The ATP Exporter (ATP-E) Family                                             | 1          |
| 9.A.8        | The Ferrous Iron Uptake (FeoB) Family                                       | 1          |
| 9.A.10       | The Oligomeric Probable Pore-forming SpoIIA Toxin (SpoIIA) Family           | 6          |
| 9.A.14       | The G-protein-coupled receptor (GPCR) Family                                | 6          |
| 9.A.25       | The Por Protein Secretin System (PorSS) Family                              | 1          |
| 9.A.26       | The Lipid-translocating Exporter (LTE) Family                               | 7          |
| 9.A.27       | The Non-Classical Protein Exporter (NCPE) Family                            | 1          |
| 9.A.34       | Unclassified ClpB/EvpH protein                                              | 3          |
| 9.A.36       | The Ca <sup>2+</sup> -dependent Phospholipid Scramblase (Scramblase) Family | 1          |
| 9.A.48       | The Unconventional Protein Secretion (UPS) System                           | 2          |
| 9.A.49       | Multi-pass membrane protein                                                 | 1          |
| 9.A.50       | The Nuclear t-RNA Exporter (t-Exporter) Family                              | 9          |
| 9.A.54       | The Lysosomal Cobalamin (B12) Transporter (L-B12T) Family                   | 1          |
| 9.B          | Putative uncharacterized transport proteins                                 | 25         |
| 9.C          | Functionally characterized transporters lacking identified sequences        | 1          |
| <b>TOTAL</b> |                                                                             | <b>821</b> |

**Supplementary Table 16.** Genes involved in putative biosynthetic gene clusters in *A. rabiei*.

| <b>Gene Cluster</b> | <b>Type</b>   | <b>Putative Biosynthetic Genes</b> | <b>Domain/Function</b>                         | <b>Scaffold</b> | <b>Location</b> |
|---------------------|---------------|------------------------------------|------------------------------------------------|-----------------|-----------------|
| Cluster 1           | Terpene       | ST47_g210                          | Intra molecular transferase activity           | Scaffold 7      | 93538-95919     |
| Cluster 2           | Cf fatty acid | ST47_g984                          | Beta-ketoacyl-synthase                         | Scaffold 78     | 4127-9819       |
|                     |               | ST47_g985                          | Malonyl CoA-acyl carrier protein transacylase  |                 | 11388-17690     |
| Cluster 3           | Nrps-t1pks    | ST47_g1537                         | Cytochrome P450                                | Scaffold 115    | 70900-74460     |
|                     |               | ST47_g1538                         | O-methyltransferase                            |                 | 74903-7625      |
|                     |               | ST47_g1539                         | Crotonyl Co-A reductase /alcohol dehydrogenase |                 | 77261-78511     |
|                     |               | ST47_g1540                         | Beta-ketoacyl synthase                         |                 | 80987-93520     |
| Cluster 4           | Nrps          | ST47_g1690                         | FAD dependent oxidoreductase                   | Scaffold 122    | 85491-86966     |
|                     |               | ST47_g1693                         | AMP-dependent synthetase and ligase            |                 | 92383-108664    |
|                     |               | ST47_g1695                         | Lysine/ornithine N-monooxygenase               |                 | 115556-117252   |
| Cluster 5           | Terpene       | ST47_g2205                         | Polyprenyl synthetase                          | Scaffold 148    | 8840-10190      |
| Cluster 6           | T3pks         | ST47_g2281                         | Chalcone and stilbene synthase domain protein  | Scaffold 148    | 237024-238405   |
|                     |               | ST47_g2284                         | Beta-lactamase                                 |                 | 244246-248762   |
| Cluster 7           | Nrps          | ST47_g2791                         | Riboflavin biosynthesis protein RibD           | Scaffold 161    | 24991-25560     |
|                     |               | ST47_g2799                         | Aminotransferase                               |                 | 35983-37596     |
|                     |               | ST47_g2802                         | AMP-dependent synthetase and ligase            |                 | 42505-48413     |
|                     |               | ST47_g2805                         | Lysine/ornithine N-monooxygenase               |                 | 55194-56468     |
|                     |               | ST47_g2806                         | Putative siderophore biosynthesis protein      |                 | 57022-61789     |
|                     |               | ST47_g2807                         | FAD dependent                                  |                 | 64160-65809     |

|               |         |                                                      |                                                                                                                                       |                 |                                                       |
|---------------|---------|------------------------------------------------------|---------------------------------------------------------------------------------------------------------------------------------------|-----------------|-------------------------------------------------------|
|               |         |                                                      | oxidoreductase                                                                                                                        |                 |                                                       |
| Cluster 8     | Terpene | ST47_g3203<br>ST47_g3205                             | Tryptophan dimethyl<br>allyltransferase activity<br>Alpha/beta hydrolase<br>fold protein                                              | Scaffold<br>168 | 76380-77840<br>82829-84509                            |
| Cluster 9     | T1pks   | ST47_g3825<br>ST47_g3826<br>ST47_g3828<br>ST47_g3829 | Aminotransferase class<br>V<br>AMP-dependent<br>synthetase and ligase<br>Beta-ketoacyl synthase<br>O-methyltransferase                | Scaffold<br>189 | 5021-6414<br>7193-11313<br>14932-22986<br>24291-25780 |
| Cluster<br>10 | Other   | ST47_g4003<br>ST47_g4004<br>ST47_g4005<br>ST47_g4008 | FAD linked oxidase<br>domain protein<br>Dehydrogenase<br>AMP-dependent<br>synthetase and ligase<br>Phenylalanine-specific<br>permease | Scaffold<br>197 | 139-2015<br>2761-3871<br>5032-8230<br>19918-22026     |
| Cluster<br>11 | Other   | ST47_g5404<br>ST47_g5410                             | Pyruvate<br>oxidase/decarboxylase<br>AMP-dependent<br>synthetase and ligase                                                           | Scaffold<br>241 | 38532-40456<br>52903-56190                            |
| Cluster<br>12 | Terpene | ST47_g5562                                           | Geranylgeranyl-<br>diphosphate<br>geranylgeranyl<br>transferase activity                                                              | Scaffold<br>245 | 48950-50852                                           |
| Cluster<br>13 | Other   | ST47_g5739<br>ST47_g5740<br>ST47_g5743               | GCN5-related N-<br>acetyltransferase<br>NAD-dependent<br>epimerase/dehydratase<br>AMP-dependent<br>synthetase and ligase              | Scaffold<br>246 | 364011-364868<br>365390-36615<br>378045-381288        |
| Cluster<br>14 | T1pks   | ST47_g6273<br>ST47_g6275<br>ST47_g6277               | Metallo-beta-lactamase<br>family protein<br>Beta-ketoacyl synthase<br>Short-chain<br>dehydrogenase/<br>reductase SDR                  | Scaffold<br>258 | 310530-311642<br>314565-321085<br>339615-340523       |
| Cluster<br>15 | T1pks   | ST47_g6515<br>ST47_g6516                             | Beta-ketoacyl synthase<br>Beta-ketoacyl synthase                                                                                      | Scaffold<br>265 | 3479-11150<br>11854-19735                             |

|            |       |            |                                                 |              |               |
|------------|-------|------------|-------------------------------------------------|--------------|---------------|
|            |       | ST47_g6517 | Crotonyl Co-A reductase / alcohol dehydrogenase |              | 20099-21211   |
|            |       | ST47_g6518 | NAD-dependent epimerase/dehydratase             |              | 21736-22814   |
| Cluster 16 | Other | ST47_g7073 | AMP-dependent synthetase and ligase             | Scaffold 286 | 104445-108296 |
|            |       | ST47_g7080 | Phenylalanine-specific permease                 |              | 122285-124256 |
| Cluster 17 | T1pks | ST47_g7183 | Short-chain dehydrogenase/reductase SDR         | Scaffold 287 | 27211-27954   |
|            |       | ST47_g7185 | Crotonyl Co-A reductase / alcohol dehydrogenase |              | 30542-31869   |
|            |       | ST47_g7187 | Beta-lactamase                                  |              | 34390-36349   |
|            |       | ST47_g7190 | Beta-ketoacyl synthase                          |              | 44122-51346   |
|            |       | ST47_g7195 | Cytochrome P450                                 |              | 65485-67326   |
| Cluster 18 | T1pks | ST47_g7695 | FAD linked oxidase domain protein               | Scaffold 301 | 2057-3882     |
|            |       | ST47_g7696 | Short-chain dehydrogenase/reductase SDR         |              | 7345-8522     |
|            |       | ST47_g7697 | Cytochrome P450                                 |              | 8570-10366    |
|            |       | ST47_g7698 | Crotonyl Co-A reductase / alcohol dehydrogenase |              | 10675-11868   |
|            |       | ST47_g7699 | Cytochrome P450                                 |              | 12228-13958   |
|            |       | ST47_g7700 | Beta-ketoacyl synthase                          |              | 14689-23522   |
| Cluster 19 | T1pks | ST47_g8044 | O-methyltransferase                             | Scaffold 314 | 3217-4633     |
|            |       | ST47_g8045 | Short-chain dehydrogenase/reductase SDR         |              | 5379-6419     |
|            |       | ST47_g8046 | O-methyltransferase                             |              | 6959-8330     |
|            |       | ST47_g8047 | Beta-ketoacyl synthase                          |              | 9688-16699    |
|            |       | ST47_g8049 | Cytochrome P450                                 |              | 20656-22266   |
|            |       | ST47_g8051 | Crotonyl Co-A reductase / alcohol dehydrogenase |              | 24090-25115   |



|            |               |                          |                                                              |              |                                |
|------------|---------------|--------------------------|--------------------------------------------------------------|--------------|--------------------------------|
| Cluster 20 | T1pks         | ST47_g8065               | Beta-ketoacyl synthase                                       | Scaffold 315 | 28876-37239                    |
| Cluster 21 | T1pks         | ST47_g8486               | Phenylalanine-specific permease                              | Scaffold 327 | 240971-242706                  |
|            |               | ST47_g8492               | Beta-ketoacyl synthase                                       |              | 257757-265846                  |
|            |               | ST47_g8494               | Crotonyl Co-A reductase / alcohol dehydrogenase              |              | 267346-268427                  |
|            |               | ST47_g8495               | Short-chain dehydrogenase/reductase SDR                      |              | 269155-270275                  |
|            |               | ST47_g8498               | Short-chain dehydrogenase/reductase SDR                      |              | 276019-278998                  |
|            |               | ST47_g8499<br>ST47_g8500 | Beta-ketoacyl synthase<br>3-hydroxybutyryl-CoA dehydrogenase |              | 279585-286398<br>287651-289450 |
| Cluster 22 | Other         | ST47_g8723               | AMP-dependent synthetase and ligase                          | Scaffold 331 | 118471-121704                  |
|            |               | ST47_g8726               | Cytochrome P450                                              |              | 129659-133547                  |
| Cluster 23 | T1pks         | ST47_g8726               | Cytochrome P450                                              | Scaffold 331 | 129659-133547                  |
|            |               | ST47_g8732               | Beta-ketoacyl synthase                                       |              | 147182-152635                  |
| Cluster 24 | Terpene       | ST47_g9109               | Farnesyl-diphosphate Farnesyltransferase activity            | Scaffold 336 | 540093-541743                  |
| Cluster 25 | Cf fatty acid | ST47_g9884               | Alpha/beta hydrolase domain-containing protein               | Scaffold 358 | 34451-35722                    |
|            |               | ST47_g9885               | Alpha/beta hydrolase fold protein                            |              | 36284-42661                    |
|            |               | ST47_g9886               | Beta-ketoacyl synthase                                       |              | 43248-44872                    |
|            |               | ST47_g9891               | Short-chain dehydrogenase/reductase SDR                      |              | 49560-50237                    |
|            |               | ST47_g9893               | Isochorismatase                                              |              | 52308-53687                    |
| Cluster 26 | Other         | ST47_g9915               | Short-chain dehydrogenase/reductase SDR                      | Scaffold 363 | 18895-19809                    |
|            |               | ST47_g9918               | AMP-dependent synthetase and ligase                          |              | 27020-30622                    |

|  |            |                                                |             |
|--|------------|------------------------------------------------|-------------|
|  | ST47_g9921 | Alcohol dehydrogenase                          | 39854-40995 |
|  | ST47_g9926 | Argininosuccinate lyase/adenylosuccinate lyase | 47692-49172 |

**Supplementary Table 17.** Summary counts of CAZymes content of *A. rabiei*.

| <b>CAZymes categories and their numbers</b> |                   |                  |                 |                   |                 |
|---------------------------------------------|-------------------|------------------|-----------------|-------------------|-----------------|
| <b>GH</b>                                   | <b>GT</b>         | <b>CE</b>        | <b>PL</b>       | <b>CBM</b>        | <b>AA</b>       |
| GH1 – 12                                    | GT1 – 14          | <b>CE1 – 12</b>  | <b>PL1 – 10</b> | <b>CBM1 – 8</b>   | <b>AA1 – 10</b> |
| GH2 – 8                                     | <b>GT2 – 87</b>   | <b>CE4 – 17</b>  | <b>PL3 – 10</b> | CBM2 – 4          | AA2 – 9         |
| <b>GH3 – 29</b>                             | GT3 – 1           | <b>CE5 – 12</b>  | PL4 – 3         | CBM6 – 3          | <b>AA3 – 60</b> |
| GH5 – 13                                    | <b>GT4 – 70</b>   | CE8 – 4          |                 | CBM12 – 4         | AA4 – 7         |
| GH6 – 3                                     | GT5 – 2           | <b>CE9 – 13</b>  |                 | <b>CBM13 – 17</b> | AA5 – 1         |
| GH7 – 3                                     | GT8 – 4           | <b>CE10 – 71</b> |                 | CBM20 – 4         | <b>AA6 – 11</b> |
| GH9 – 2                                     | GT9 – 2           | <b>CE11 – 58</b> |                 | CBM21 – 6         | <b>AA7 – 30</b> |
| GH10 – 18                                   | GT15 – 7          | CE14 – 6         |                 | CBM22 – 1         | <b>AA9 – 21</b> |
| GH11 – 3                                    | GT20 – 7          |                  |                 | CBM26 – 7         | AA10 – 8        |
| GH12 – 6                                    | GT22 – 8          |                  |                 | <b>CBM32 – 8</b>  |                 |
| GH13 – 9                                    | GT24 – 1          |                  |                 | CBM35 – 3         |                 |
| GH15 – 3                                    | GT25 – 4          |                  |                 | CBM42 – 1         |                 |
| GH16 – 13                                   | GT26 – 1          |                  |                 | CBM43 – 2         |                 |
| GH17 – 11                                   | GT28 – 7          |                  |                 | <b>CBM48 – 24</b> |                 |
| <b>GH18 – 33</b>                            | GT30 – 3          |                  |                 | <b>CBM50 – 25</b> |                 |
| GH20 – 7                                    | GT31 – 9          |                  |                 | CBM51 – 3         |                 |
| GH23 – 9                                    | GT32 – 4          |                  |                 | CBM54 – 2         |                 |
| GH26 – 1                                    | <b>GT34 – 79</b>  |                  |                 | CBM57 – 4         |                 |
| GH27 – 7                                    | GT35 – 1          |                  |                 |                   |                 |
| <b>GH28 – 36</b>                            | GT39 – 4          |                  |                 |                   |                 |
| GH29 – 1                                    | <b>GT41 – 20</b>  |                  |                 |                   |                 |
| GH31 – 11                                   | GT47 – 1          |                  |                 |                   |                 |
| GH 32 – 22                                  | <b>GT48 – 315</b> |                  |                 |                   |                 |
| GH33 – 7                                    | GT49 – 2          |                  |                 |                   |                 |
| GH35 – 5                                    | GT50 – 7          |                  |                 |                   |                 |
| GH 36 – 1                                   | GT51 – 5          |                  |                 |                   |                 |
| GH37 – 2                                    | GT54 – 1          |                  |                 |                   |                 |
| GH38 – 5                                    | GT55 – 14         |                  |                 |                   |                 |
| GH39 – 2                                    | GT57 – 2          |                  |                 |                   |                 |

|                  |            |            |           |            |            |
|------------------|------------|------------|-----------|------------|------------|
| GH43 – 17        | GT58 – 2   |            |           |            |            |
| GH45 – 2         | GT59 – 1   |            |           |            |            |
| GH47 – 13        | GT60 – 1   |            |           |            |            |
| GH51 – 2         | GT62 – 3   |            |           |            |            |
| GH53 – 3         | GT66 – 13  |            |           |            |            |
| GH54 – 1         | GT69 – 2   |            |           |            |            |
| GH55 – 5         | GT71 – 1   |            |           |            |            |
| GH62 – 2         | GT76 – 1   |            |           |            |            |
| GH63 – 1         | GT83 – 3   |            |           |            |            |
| GH65 – 20        | GT87 – 12  |            |           |            |            |
| GH71 – 4         | GT90 – 15  |            |           |            |            |
| GH72 – 18        |            |            |           |            |            |
| GH75 – 2         |            |            |           |            |            |
| <b>GH76 – 60</b> |            |            |           |            |            |
| GH78 – 6         |            |            |           |            |            |
| GH81 – 2         |            |            |           |            |            |
| GH84 – 8         |            |            |           |            |            |
| GH85 – 3         |            |            |           |            |            |
| GH89 – 1         |            |            |           |            |            |
| <b>GH92 – 50</b> |            |            |           |            |            |
| GH94 – 1         |            |            |           |            |            |
| GH99 – 1         |            |            |           |            |            |
| GH103 – 4        |            |            |           |            |            |
| GH109 – 12       |            |            |           |            |            |
| GH125 – 3        |            |            |           |            |            |
| GH127 – 1        |            |            |           |            |            |
| GH128 – 5        |            |            |           |            |            |
| GH130 – 10       |            |            |           |            |            |
| GH132 - 7        |            |            |           |            |            |
|                  |            |            |           |            |            |
| <b>Total</b>     |            |            |           |            |            |
| <b>546</b>       | <b>736</b> | <b>193</b> | <b>23</b> | <b>126</b> | <b>157</b> |

**Supplementary Table 18.** Summary of proteins putatively involved in pathogen-host interactions in *A. rabiei*.

| <b>S.No.</b> | <b>Mutant phenotype</b>              | <b>Number of proteins</b> |
|--------------|--------------------------------------|---------------------------|
| 1.           | Loss of pathogenicity                | 222                       |
| 2.           | Reduced virulence                    | 1,037                     |
| 3.           | Mixed outcome                        | 172                       |
| 4.           | Effectors                            | 13                        |
|              | <b>Total</b>                         | <b>1,444</b>              |
| 5.           | Unaffected pathogenicity             | 1,073                     |
| 6.           | Increased virulence (Hypervirulence) | 58                        |
| 7.           | Lethal                               | 93                        |
| 8.           | Sensitive to chemicals               | 15                        |
| 9.           | Resistant to chemicals               | 5                         |
| 10.          | Partially lost Ax21                  | 16                        |
| 11.          | Enhanced antagonism                  | 1                         |
| 12.          | Wild type mutualism                  | 1                         |
| 13.          | Essential                            | 1                         |

**Supplementary Table 19.** Summary counts of CAZymes content of *A. rabiei* secretome.

| <b>CAZymes categories and their numbers</b> |                |                  |                |                   |                 |
|---------------------------------------------|----------------|------------------|----------------|-------------------|-----------------|
| <b>GH</b>                                   | <b>GT</b>      | <b>CE</b>        | <b>PL</b>      | <b>CBM</b>        | <b>AA</b>       |
| <b>GH1 – 1</b>                              | <b>GT2 – 2</b> | <b>CE1 – 2</b>   | <b>PL1 – 8</b> | <b>CBM1 – 5</b>   | <b>AA1 – 5</b>  |
| <b>GH2 – 2</b>                              | <b>GT4 – 1</b> | <b>CE4 – 3</b>   | <b>PL3 – 8</b> | <b>CBM13 – 4</b>  | <b>AA2 – 3</b>  |
| <b>GH3 – 8</b>                              |                | <b>CE5 – 9</b>   | <b>PL4 – 3</b> | <b>CBM20 – 3</b>  | <b>AA3 – 4</b>  |
| <b>GH5 – 6</b>                              |                | <b>CE8 – 2</b>   |                | <b>CBM42 – 1</b>  | <b>AA5 – 1</b>  |
| <b>GH6 – 3</b>                              |                | <b>CE10 – 16</b> |                | <b>CBM48 – 1</b>  | <b>AA7 – 9</b>  |
| <b>GH7 – 3</b>                              |                |                  |                | <b>CBM50 – 10</b> | <b>AA9 – 17</b> |
| <b>GH10 – 5</b>                             |                |                  |                |                   |                 |
| <b>GH11 – 3</b>                             |                |                  |                |                   |                 |
| <b>GH12 – 3</b>                             |                |                  |                |                   |                 |
| <b>GH13 – 1</b>                             |                |                  |                |                   |                 |
| <b>GH15 – 1</b>                             |                |                  |                |                   |                 |
| <b>GH16 – 2</b>                             |                |                  |                |                   |                 |
| <b>GH17 – 2</b>                             |                |                  |                |                   |                 |
| <b>GH18 – 6</b>                             |                |                  |                |                   |                 |

|                  |          |           |           |           |           |
|------------------|----------|-----------|-----------|-----------|-----------|
| GH26 – 1         |          |           |           |           |           |
| <b>GH28 – 10</b> |          |           |           |           |           |
| GH29 – 1         |          |           |           |           |           |
| GH31 – 2         |          |           |           |           |           |
| GH32 – 3         |          |           |           |           |           |
| GH35 – 4         |          |           |           |           |           |
| <b>GH43 – 6</b>  |          |           |           |           |           |
| GH45 – 1         |          |           |           |           |           |
| GH47 – 2         |          |           |           |           |           |
| GH51 – 1         |          |           |           |           |           |
| GH53 – 1         |          |           |           |           |           |
| GH54 – 1         |          |           |           |           |           |
| GH62 – 2         |          |           |           |           |           |
| GH65 – 1         |          |           |           |           |           |
| GH71 – 2         |          |           |           |           |           |
| GH76 – 1         |          |           |           |           |           |
| GH78 – 2         |          |           |           |           |           |
| GH89 – 1         |          |           |           |           |           |
| GH92 – 2         |          |           |           |           |           |
| GH103 – 1        |          |           |           |           |           |
| GH127 – 1        |          |           |           |           |           |
| GH128 – 3        |          |           |           |           |           |
|                  |          |           |           |           |           |
| <b>Total</b>     |          |           |           |           |           |
| <b>95</b>        | <b>3</b> | <b>32</b> | <b>19</b> | <b>24</b> | <b>39</b> |

**Supplementary Table 20.** The effector proteins putatively involved in pathogen-host interactions in *A. rabiei*.

| <b>S.No.</b> | <b>Mutant phenotype</b>  | <b>Number of proteins</b> |
|--------------|--------------------------|---------------------------|
| 1.           | Loss of pathogenicity    | 12                        |
| 2.           | Reduced virulence        | 53                        |
| 3.           | Mixed outcome            | 2                         |
| 4.           | Effectors                | 3                         |
|              | <b>Total</b>             | <b>70</b>                 |
|              |                          |                           |
| 5.           | Unaffected pathogenicity | 95                        |
| 6.           | Increased virulence      | 2                         |

**Supplementary Table 21.** The unannotated secretory proteins having tandem repeats.

| S.No. | Gene ID    | Repeat Length | Repeat Frequency | Position           | Repeat Sequence                 |
|-------|------------|---------------|------------------|--------------------|---------------------------------|
| 1.    | ST47_g587  | 3             | 10               | 51-80              | GAA                             |
| 2.    | ST47_g917  | 6<br>9        | 19<br>11         | 217-316<br>693-775 | DAAPV-<br>PTSTPDE--             |
| 3.    | ST47_g972  | 13            | 14               | 343-518            | LGLPAGGLPTLPN                   |
| 4.    | ST47_g1978 | 2             | 14               | 181-209            | GN                              |
| 5.    | ST47_g2073 | 1             | 16               | 88-103             | G                               |
| 6.    | ST47_g2119 | 2             | 12               | 25-48              | GT                              |
| 7.    | ST47_g3121 | 10            | 12               | 295-410            | DPYPTETPEY                      |
| 8.    | ST47_g3860 | 1             | 10               | 203-212            | G                               |
| 9.    | ST47_g4696 | 6             | 11               | 45-111             | SSTASL-                         |
| 10.   | ST47_g4774 | 2             | 13               | 44-69              | HD                              |
| 11.   | ST47_g5062 | 8             | 10               | 123-202            | SAALVNFP                        |
| 12.   | ST47_g5065 | 1             | 11               | 58-68              | D                               |
| 13.   | ST47_g6278 | 5             | 12               | 335-394            | TGNTN                           |
| 14.   | ST47_g6554 | 10<br>10      | 10<br>22         | 162-263<br>318-550 | GGLL---PTDIL---<br>TDVLGDLATGLP |
| 15.   | ST47_g6845 | 5<br>6        | 17<br>17         | 728-813<br>496-587 | LPIPD<br>LPDAG-                 |
| 16.   | ST47_g7300 | 2             | 11               | 59-80              | DT                              |
| 17.   | ST47_g7602 | 6             | 15               | 316-400            | QQSANG                          |
| 18.   | ST47_g7675 | 2             | 12               | 140-164            | KG                              |
|       |            | 6             | 25               | 297-446            | QTGTGA                          |
| 19.   | ST47_g8191 | 2             | 15               | 198-228            | GK                              |
| 20.   | ST47_g8756 | 2             | 9                | 104-122            | GK                              |
| 21.   | ST47_g9151 | 5             | 12               | 261-314            | AAATS                           |

**Supplementary Table 22.** The prediction of *in planta* localization of mature effector proteins.

| S.No. | Cell organelle  | Number of effector proteins |
|-------|-----------------|-----------------------------|
| 1.    | Cytoplasm       | 72                          |
| 2.    | Extracellular   | 448                         |
| 3.    | Nucleus         | 164                         |
| 4.    | Mitochondria    | 14                          |
| 5.    | Chloroplast     | 30                          |
| 6.    | Peroxisome      | 2                           |
| 7.    | Lysosome        | 8                           |
| 8.    | Plasma membrane | 10                          |
| 9.    | Vacuole         | 10                          |

**Supplementary Table 23.** The prediction of NLS in effectors predicted to localize in nucleus inside the host.

| S.No. | Effector protein | Predicted NLS                                                               |
|-------|------------------|-----------------------------------------------------------------------------|
| 1.    | ST47_g880        | 196 - RMRRSKKLSQKDKPPKERRRRRKRP - 220                                       |
| 2.    | ST47_g1734       | 22 - RKRRRRR - 28                                                           |
| 3.    | ST47_g2418       | 461 - KRNSKVFSARRPGKRV - 476                                                |
| 4.    | ST47_g3617       | 98 - KPRRALP - 104<br>113 - RRRPTTRTK - 121                                 |
| 5.    | ST47_g3668       | 281 - KRAIAYKLKKRMELSR - 296                                                |
| 6.    | ST47_g4241       | 231 - GGRKYAKEKRSHSEEGRPHRHRDAYREGREEGRDDR<br>EHGRHRHRGAYREGKEDRRRDAR - 290 |
| 7.    | ST47_g4988       | 60 - RRRLHRRRRRPCSARSLHRP - 79                                              |
| 8.    | ST47_g6278       | 510 - AGKPGAPAKPERRQSSEK - 527                                              |
| 9.    | ST47_g7291       | 301 - RGRARDRFGFGNGDANGSRNPSGPAPPLQNPRKRRR<br>EEKRQEKRR - 346               |
| 10.   | ST47_g7442       | 111 - PRRGRGGRGFRGRGFRGRGRGGR - 133                                         |
| 11.   | ST47_g7463       | 14 - KA - 15                                                                |
| 12.   | ST47_g7675       | 112 - GGKAAKGAKGKKGKKGKKGKKGKKGK - 138                                      |

|     |             |                                                             |
|-----|-------------|-------------------------------------------------------------|
| 13. | ST47_g8330  | 83 - KR - 84<br>108 - GSGKSKKKKGKGGAG - 121                 |
| 14. | ST47_g8561  | 350 - ARR - 352                                             |
| 15. | ST47_g9775  | 381 - GGRGGRGGNGRGNN - 394                                  |
| 16. | ST47_g9812  | 123 - KSRRGWKGKRKTKR - 136                                  |
| 17. | ST47_g10316 | 143 - PRTKAKNKRNRDKYKAKKRDERHKREQARKK - 173                 |
| 18. | ST47_g10372 | 16 - KQARRSRSASAKRERSKSKGRKEAGKEAGKEAGKE<br>AGKEAGKESR - 62 |

**Supplementary Table 24.** The list of primers used in this study.

| No. | Name  | Sequence (5' to 3')         | Purpose                                                 |
|-----|-------|-----------------------------|---------------------------------------------------------|
| 1.  | Com1  | GCATGCCATATCGCCAGT          | For determining mating type 1 and 2 of <i>A. rabiei</i> |
| 2.  | SP21  | ACAGTGAGCCTGCACAGTTC        | For determining mating type 1 of <i>A. rabiei</i>       |
| 3.  | Tail5 | CGCTATTTTATCCAAGACAC<br>ACC | For determining mating type 2 of <i>A. rabiei</i>       |
